# Supplementary material for: CD38-Mediated Immunosuppression as a Mechanism of Tumor Cell Escape from PD-1/PD-L1 Blockade
Source: Oxford University Press journal article supplement (doi:10.1158/2159-8290.cd-17-1033), 2018-07-16
Supplement: 21598290cd171033-sup-189304_3_supp_4848981_pllgh9.xlsx [file 21598290cd171033-sup-189304_3_supp_4848981_pllgh9.xlsx]

## Sheet: Sheet1
Supplementary Table S4. Top 100 downregulated genes after anti-PD-L1 treatment.
Down	Gene symbol	Fold change	p value	Description
1	Tmigd1	-107.834	2.24339e-07	transmembrane and immunoglobulin domain containing 1
2	Abcg2	-89.0495	1.87774e-07	ATP-binding cassette, sub-family G (WHITE), member 2
3	Ly6e	-81.2549	1.22249e-06	lymphocyte antigen 6 complex, locus E
4	Col3a1	-67.8152	7.99586e-06	collagen, type III, alpha 1
5	Mt1	-51.8867	1.78452e-06	metallothionein 1
6	Plac8	-48.16	7.3504e-07	placenta-specific 8
7	Papss2	-46.0422	2.84135e-06	3'-phosphoadenosine 5'-phosphosulfate synthase 2
8	Ceacam1	-33.3013	4.10178e-06	carcinoembryonic antigen-related cell adhesion molecule 1
9	Tspan13	-33.06	2.52663e-06	tetraspanin 13
10	Lyz1	-32.536	4.78265e-05	lysozyme 1
11	Maf	-32.4251	2.18732e-06	avian musculoaponeurotic fibrosarcoma (v-maf) AS42 oncogene homolog
12	Ffar4	-32.4057	4.22608e-06	free fatty acid receptor 4
13	Fkbp10	-30.3184	4.31496e-06	FK506 binding protein 10
14	Lgals2	-29.5908	3.94111e-10	lectin, galactose-binding, soluble 2
15	Cdc42ep3	-29.5272	1.03242e-06	CDC42 effector protein (Rho GTPase binding) 3
16	2610528A11Rik	-27.3058	6.40158e-07	RIKEN cDNA 2610528A11 gene
17	Calml4	-27.1766	4.13927e-08	calmodulin-like 4
18	Fhl1	-26.8494	4.22426e-07	four and a half LIM domains 1
19	Cxcl3	-26.7707	5.19827e-06	chemokine (C-X-C motif) ligand 3
20	Cxcl5	-25.7445	3.55938e-06	chemokine (C-X-C motif) ligand 5
21	Mcpt2	-25.0712	0.000183865	mast cell protease 2
22	BC030870	-24.8524	2.04971e-05	cDNA sequence BC030870
23	Fkbp10	-23.6412	5.55068e-07	FK506 binding protein 10
24	Ugt2b34	-23.1956	1.97356e-07	UDP glucuronosyltransferase 2 family, polypeptide B34
25	Cdh17	-21.9594	2.64673e-05	cadherin 17
26	Lgals2	-21.5229	9.11001e-08	lectin, galactose-binding, soluble 2
27	Tspan12	-21.3319	4.23944e-05	tetraspanin 12
28	Basp1	-21.2078	6.36108e-07	brain abundant, membrane attached signal protein 1
29	NA	-19.4881	0.000189687	NA
30	Dsp	-19.1129	1.23431e-05	desmoplakin
31	Nid1	-18.457	1.36695e-05	nidogen 1
32	Slc39a4	-18.2409	2.92076e-06	solute carrier family 39 (zinc transporter), member 4
33	Cldn6	-17.9924	3.19101e-07	claudin 6
34	NA	-17.6633	1.09081e-06	NA
35	Serpinb1a	-17.6284	6.36476e-06	serine (or cysteine) peptidase inhibitor, clade B, member 1a
36	Ugt2b34	-17.2381	6.36473e-07	UDP glucuronosyltransferase 2 family, polypeptide B34
37	Ceacam1	-16.8018	1.48436e-05	carcinoembryonic antigen-related cell adhesion molecule 1
38	Sepp1	-16.5138	8.46513e-07	selenoprotein P, plasma, 1
39	NA	-15.3943	3.15474e-05	NA
40	Cotl1	-15.3031	1.60651e-06	coactosin-like 1 (Dictyostelium)
41	Zfhx4	-14.9684	2.82875e-05	zinc finger homeodomain 4
42	Rassf6	-14.7961	8.89583e-06	Ras association (RalGDS/AF-6) domain family member 6
43	Cotl1	-14.4846	2.82543e-05	coactosin-like 1 (Dictyostelium)
44	Mgst1	-14.2869	3.42548e-07	microsomal glutathione S-transferase 1
45	Postn	-14.0491	0.000205841	periostin, osteoblast specific factor
46	NA	-13.7143	0.000121484	NA
47	Ntn4	-13.713	9.0324e-06	netrin 4
48	Naip5	-13.5584	5.81769e-05	NLR family, apoptosis inhibitory protein 5
49	Pde4b	-13.4974	3.64347e-05	phosphodiesterase 4B, cAMP specific
50	Timp3	-13.2551	7.47459e-07	tissue inhibitor of metalloproteinase 3
51	Ceacam1	-13.207	4.61171e-06	carcinoembryonic antigen-related cell adhesion molecule 1
52	NA	-13.1347	0.000181904	NA
53	Serpine2	-13.0664	0.000301324	serine (or cysteine) peptidase inhibitor, clade E, member 2
54	Tspan13	-12.2198	5.8966e-07	tetraspanin 13
55	9630021D06Rik	-12.1729	1.69243e-06	RIKEN cDNA 9630021D06 gene
56	Dmbt1	-12.1276	3.04703e-07	deleted in malignant brain tumors 1
57	Selenbp1	-12.0397	7.25865e-08	selenium binding protein 1
58	NA	-11.912	4.21119e-05	NA
59	Cyp4f14	-11.5923	3.5282e-05	cytochrome P450, family 4, subfamily f, polypeptide 14
60	Fuca2	-11.5871	2.08083e-06	fucosidase, alpha-L- 2, plasma
61	Cym	-11.1142	0.000392325	chymosin
62	Cpm	-10.9064	0.000216577	carboxypeptidase M
63	Cotl1	-10.5527	5.13919e-05	coactosin-like 1 (Dictyostelium)
64	NA	-10.4056	2.07267e-05	NA
65	Klf4	-10.2886	2.99739e-06	Kruppel-like factor 4 (gut)
66	Ceacam1	-10.2659	2.36329e-05	carcinoembryonic antigen-related cell adhesion molecule 1
67	Ly6a	-10.1593	2.32469e-06	lymphocyte antigen 6 complex, locus A
68	Aass	-10.0959	1.18033e-05	aminoadipate-semialdehyde synthase
69	Smarca1	-10.0761	3.5402e-05	SWI/SNF related, matrix associated, actin dependent regulator of chromatin, subfamily a, member 1
70	NA	-9.97629	1.78335e-06	NA
71	Kcne3	-9.70893	5.94164e-07	potassium voltage-gated channel, Isk-related subfamily, gene 3
72	Arg1	-9.47407	0.000454309	arginase, liver
73	Pde4b	-9.45891	0.000111053	phosphodiesterase 4B, cAMP specific
74	Ociad2	-9.4437	4.87307e-07	OCIA domain containing 2
75	6230424C14Rik	-9.35015	1.57711e-05	RIKEN cDNA 6230424C14 gene
76	Bicc1	-9.2523	4.90405e-06	bicaudal C homolog 1 (Drosophila)
77	Stc2	-9.20506	0.000125802	stanniocalcin 2
78	Trpa1	-9.15398	9.14025e-06	transient receptor potential cation channel, subfamily A, member 1
79	Apoc2	-9.14462	4.69807e-07	apolipoprotein C-II
80	Timp3	-8.80377	0.00013602	tissue inhibitor of metalloproteinase 3
81	Nt5e	-8.69996	0.000100327	5' nucleotidase, ecto
82	Tpmt	-8.66529	2.69266e-07	thiopurine methyltransferase
83	Ecscr	-8.63605	1.52093e-05	endothelial cell surface expressed chemotaxis and apoptosis regulator
84	Ncam1	-8.59309	4.10884e-06	neural cell adhesion molecule 1
85	Fign	-8.56263	2.25758e-05	fidgetin
86	Dsp	-8.48701	1.38798e-06	desmoplakin
87	Sema3b	-8.46859	0.000133605	sema domain, immunoglobulin domain (Ig), short basic domain, secreted, (semaphorin) 3B
88	Hnf4a	-8.46338	1.00848e-05	hepatic nuclear factor 4, alpha
89	Lyz2	-8.4491	0.000361451	lysozyme 2
90	Palld	-8.40648	3.67056e-05	palladin, cytoskeletal associated protein
91	Klf4	-8.32747	5.5025e-07	Kruppel-like factor 4 (gut)
92	Aldoc	-8.20632	5.40507e-05	aldolase C, fructose-bisphosphate
93	Col1a2	-8.20189	0.000346745	collagen, type I, alpha 2
94	Papss2	-8.11103	1.38687e-06	3'-phosphoadenosine 5'-phosphosulfate synthase 2
95	Bche	-8.10985	1.5865e-05	butyrylcholinesterase
96	Ddr2	-7.98346	3.64375e-06	discoidin domain receptor family, member 2
97	Pkdcc	-7.94908	2.59774e-05	protein kinase domain containing, cytoplasmic
98	Socs2	-7.94679	0.000122745	suppressor of cytokine signaling 2
99	Chil4	-7.75778	0.000177813	chitinase-like 4
100	Pogk	-7.75221	4.23803e-05	pogo transposable element with KRAB domain
