# Supplementary material for: CD38-Mediated Immunosuppression as a Mechanism of Tumor Cell Escape from PD-1/PD-L1 Blockade
Source: Oxford University Press journal article supplement (doi:10.1158/2159-8290.cd-17-1033), 2018-07-16
Supplement: 21598290cd171033-sup-189304_3_supp_4848982_pllgh9.xlsx [file 21598290cd171033-sup-189304_3_supp_4848982_pllgh9.xlsx]

## Sheet: Sheet1
Supplementary Table S5. The ranked gene list for GSEA.
NAME	DESCRIPTION	GENE_SYMBOL	GENE_TITLE	SCORE
TMIGD1	null	TMIGD1	transmembrane and immunoglobulin domain containing 1	2.80356
GM1960	null	null	null	2.74488
CXCL5	null	CXCL5	chemokine (C-X-C motif) ligand 5	2.6628
LZP-S	null	null	null	2.64503
ABCG2	null	ABCG2	ATP-binding cassette, sub-family G (WHITE), member 2	2.5141
9630021D06RIK	null	null	null	2.40716
COL3A1	null	COL3A1	collagen, type III, alpha 1 (Ehlers-Danlos syndrome type IV, autosomal dominant)	2.37999
KCNE3	null	KCNE3	potassium voltage-gated channel, Isk-related family, member 3	2.30355
ZFHX4	null	ZFHX4	zinc finger homeodomain 4	2.27759
FHL1	null	FHL1	four and a half LIM domains 1	2.21896
LOC624112	null	null	null	2.18156
FKBP10	null	FKBP10	FK506 binding protein 10, 65 kDa	2.17825
GEM	null	GEM	GTP binding protein overexpressed in skeletal muscle	2.15049
PDGFRB	null	PDGFRB	platelet-derived growth factor receptor, beta polypeptide	2.12735
SERPINE2	null	SERPINE2	serpin peptidase inhibitor, clade E (nexin, plasminogen activator inhibitor type 1), member 2	2.05464
D7ERTD715E	null	null	null	2.04757
CDH17	null	CDH17	cadherin 17, LI cadherin (liver-intestine)	2.04365
CDH11	null	CDH11	cadherin 11, type 2, OB-cadherin (osteoblast)	2.04133
NID1	null	NID1	nidogen 1	2.02702
GPR120	null	GPR120	G protein-coupled receptor 120	1.98195
MARVELD2	null	MARVELD2	MARVEL domain containing 2	1.96572
MAF	null	MAF	v-maf musculoaponeurotic fibrosarcoma oncogene homolog (avian)	1.93165
HECTD2	null	HECTD2	HECT domain containing 2	1.92988
PDE4B	null	PDE4B	phosphodiesterase 4B, cAMP-specific (phosphodiesterase E4 dunce homolog, Drosophila)	1.92658
PLAC8	null	PLAC8	placenta-specific 8	1.92389
1700008I05RIK	null	null	null	1.92288
SERPINB1A	null	null	null	1.90077
POSTN	null	POSTN	periostin, osteoblast specific factor	1.89363
LY6E	null	LY6E	lymphocyte antigen 6 complex, locus E	1.88265
DDR2	null	DDR2	discoidin domain receptor family, member 2	1.88053
BIRC1E	null	null	null	1.87249
MYB	null	MYB	v-myb myeloblastosis viral oncogene homolog (avian)	1.86563
BC030870	null	null	null	1.82524
UGT2B34	null	null	null	1.82078
GIMAP9	null	null	null	1.81835
PCDHB21	null	null	null	1.80872
FUCA2	null	FUCA2	fucosidase, alpha-L- 2, plasma	1.80232
CD55	null	CD55	CD55 molecule, decay accelerating factor for complement (Cromer blood group)	1.79489
2610528A11RIK	null	null	null	1.78668
POGK	null	POGK	pogo transposable element with KRAB domain	1.77593
PAPSS2	null	PAPSS2	3'-phosphoadenosine 5'-phosphosulfate synthase 2	1.75251
MCPT2	null	null	null	1.73522
SMARCA1	null	SMARCA1	SWI/SNF related, matrix associated, actin dependent regulator of chromatin, subfamily a, member 1	1.73391
MT1A	null	MT1A	metallothionein 1A (functional)	1.72486
GC	null	GC	group-specific component (vitamin D binding protein)	1.72405
CDC42EP3	null	CDC42EP3	CDC42 effector protein (Rho GTPase binding) 3	1.70809
ARG1	null	ARG1	arginase, liver	1.69709
CXCL14	null	CXCL14	chemokine (C-X-C motif) ligand 14	1.69196
CLDN6	null	CLDN6	claudin 6	1.68214
CHI3L4	null	null	null	1.67564
BCHE	null	BCHE	butyrylcholinesterase	1.67303
IFITM3	null	IFITM3	interferon induced transmembrane protein 3 (1-8U)	1.66897
GM131 /// LOC634449	null	null	null	1.6682
ITM2A	null	ITM2A	integral membrane protein 2A	1.65873
PCDHB22	null	null	null	1.65241
MGST1	null	MGST1	microsomal glutathione S-transferase 1	1.64822
SLC39A4	null	SLC39A4	solute carrier family 39 (zinc transporter), member 4	1.6399
CHI3L3 /// CHI3L4	null	null	null	1.61902
RASSF6	null	RASSF6	Ras association (RalGDS/AF-6) domain family 6	1.61805
1700019G17RIK	null	null	null	1.61539
APOB	null	APOB	apolipoprotein B (including Ag(x) antigen)	1.60416
TIMP3	null	TIMP3	TIMP metallopeptidase inhibitor 3 (Sorsby fundus dystrophy, pseudoinflammatory)	1.59437
APOC2	null	APOC2	apolipoprotein C-II	1.59237
PRG1	null	PRG1	proteoglycan 1, secretory granule	1.5837
CLCA4	null	CLCA4	chloride channel, calcium activated, family member 4	1.5823
C4BPA	null	C4BPA	complement component 4 binding protein, alpha	1.57727
KCNU1	null	KCNU1	potassium channel, subfamily U, member 1	1.56133
EPAS1	null	EPAS1	endothelial PAS domain protein 1	1.56001
RAB7L1	null	RAB7L1	RAB7, member RAS oncogene family-like 1	1.55969
DNASE2	null	DNASE2	deoxyribonuclease II, lysosomal	1.55839
OCIAD2	null	OCIAD2	OCIA domain containing 2	1.55333
AS3MT	null	AS3MT	arsenic (+3 oxidation state) methyltransferase	1.5345
SGPP2	null	SGPP2	sphingosine-1-phosphate phosphotase 2	1.51327
C1QB	null	C1QB	complement component 1, q subcomponent, B chain	1.5042
ABCA1	null	ABCA1	ATP-binding cassette, sub-family A (ABC1), member 1	1.49828
CYP4F14	null	null	null	1.49215
CALML4	null	CALML4	calmodulin-like 4	1.48559
CHI3L3	null	null	null	1.48039
CTLA2A	null	null	null	1.47498
DDX3Y	null	DDX3Y	DEAD (Asp-Glu-Ala-Asp) box polypeptide 3, Y-linked	1.46438
TSPAN13	null	TSPAN13	tetraspanin 13	1.4322
CYP2C65	null	null	null	1.43027
SNRPN /// SNURF	null	null	null	1.42736
PPP1R3B	null	PPP1R3B	protein phosphatase 1, regulatory (inhibitor) subunit 3B	1.4246
CTSS	null	CTSS	cathepsin S	1.42345
RNF113A2	null	null	null	1.41297
UNC13B	null	UNC13B	unc-13 homolog B (C. elegans)	1.41104
FIGN	null	FIGN	fidgetin	1.40768
TRPA1	null	TRPA1	transient receptor potential cation channel, subfamily A, member 1	1.40756
COL5A2	null	COL5A2	collagen, type V, alpha 2	1.40628
GUCY2C	null	GUCY2C	guanylate cyclase 2C (heat stable enterotoxin receptor)	1.40105
GM1313	null	null	null	1.39848
TGFBI	null	TGFBI	transforming growth factor, beta-induced, 68kDa	1.38138
DMBT1	null	DMBT1	deleted in malignant brain tumors 1	1.36269
PDE9A	null	PDE9A	phosphodiesterase 9A	1.36019
CST9	null	CST9	cystatin 9 (testatin)	1.35872
1810011O10RIK	null	null	null	1.35712
LYZS	null	null	null	1.34382
TFPI2	null	TFPI2	tissue factor pathway inhibitor 2	1.33441
GSTA1 /// GSTA2	null	null	null	1.33179
HOXB3	null	HOXB3	homeobox B3	1.32096
PCDHB17	null	PCDHB17	protocadherin beta 17 pseudogene	1.31458
COL1A2	null	COL1A2	collagen, type I, alpha 2	1.31174
ANXA10	null	ANXA10	annexin A10	1.31079
BIRC1B	null	null	null	1.30193
SERPINF1	null	SERPINF1	serpin peptidase inhibitor, clade F (alpha-2 antiplasmin, pigment epithelium derived factor), member 1	1.30033
BASP1	null	BASP1	brain abundant, membrane attached signal protein 1	1.28553
LGALS2	null	LGALS2	lectin, galactoside-binding, soluble, 2 (galectin 2)	1.2721
ITGA1	null	ITGA1	integrin, alpha 1	1.26758
PIPOX	null	PIPOX	pipecolic acid oxidase	1.26496
PTPRJ /// AW125753	null	null	null	1.26417
AASS	null	AASS	aminoadipate-semialdehyde synthase	1.26004
THBS2	null	THBS2	thrombospondin 2	1.2564
LY6A	null	null	null	1.25271
EPHX2	null	EPHX2	epoxide hydrolase 2, cytoplasmic	1.25167
1110006O17RIK	null	null	null	1.25058
1700024B05RIK	null	null	null	1.24165
PCDHB20	null	null	null	1.23719
TPMT	null	TPMT	thiopurine S-methyltransferase	1.23065
RBP1	null	RBP1	retinol binding protein 1, cellular	1.21567
PLA2G7	null	PLA2G7	phospholipase A2, group VII (platelet-activating factor acetylhydrolase, plasma)	1.21454
MATN2	null	MATN2	matrilin 2	1.21011
CLCA2	null	CLCA2	chloride channel, calcium activated, family member 2	1.20664
9030623C06RIK	null	null	null	1.20343
C1R	null	C1R	complement component 1, r subcomponent	1.19611
CAR8 /// LOC676792	null	null	null	1.19223
PHYH	null	PHYH	phytanoyl-CoA 2-hydroxylase	1.18813
MS4A4D	null	null	null	1.18484
PDE5A	null	PDE5A	phosphodiesterase 5A, cGMP-specific	1.18374
ZFP618 /// LOC667396	null	null	null	1.18287
AI449310	null	null	null	1.17641
GSTK1	null	GSTK1	glutathione S-transferase kappa 1	1.16622
S100G	null	S100G	S100 calcium binding protein G	1.16276
SOCS2	null	SOCS2	suppressor of cytokine signaling 2	1.15697
TMEM12	null	TMEM12	transmembrane protein 12	1.15242
HOXA13	null	HOXA13	homeobox A13	1.13958
HCN1	null	HCN1	hyperpolarization activated cyclic nucleotide-gated potassium channel 1	1.13847
SELENBP1	null	SELENBP1	selenium binding protein 1	1.13836
IGFBP5	null	IGFBP5	insulin-like growth factor binding protein 5	1.13176
GSTT1	null	GSTT1	glutathione S-transferase theta 1	1.12882
C1QA	null	C1QA	complement component 1, q subcomponent, A chain	1.12797
PCSK5	null	PCSK5	proprotein convertase subtilisin/kexin type 5	1.12725
SCIN	null	SCIN	scinderin	1.12575
PTGER4	null	PTGER4	prostaglandin E receptor 4 (subtype EP4)	1.1257
EXDL1	null	EXDL1	exonuclease 3'-5' domain-like 1	1.12411
DPYSL3	null	DPYSL3	dihydropyrimidinase-like 3	1.12399
HOXB6	null	HOXB6	homeobox B6	1.12002
TMTC2	null	TMTC2	transmembrane and tetratricopeptide repeat containing 2	1.11431
DUSP22	null	DUSP22	dual specificity phosphatase 22	1.11413
TNC	null	TNC	tenascin C (hexabrachion)	1.11147
ALDOC	null	ALDOC	aldolase C, fructose-bisphosphate	1.11104
MT2A	null	MT2A	metallothionein 2A	1.10471
IGFBP3	null	IGFBP3	insulin-like growth factor binding protein 3	1.09908
PTPRC	null	PTPRC	protein tyrosine phosphatase, receptor type, C	1.09589
DOCK4	null	DOCK4	dedicator of cytokinesis 4	1.09526
6330530A05RIK	null	null	null	1.09358
SEMA4G	null	SEMA4G	sema domain, immunoglobulin domain (Ig), transmembrane domain (TM) and short cytoplasmic domain, (semaphorin) 4G	1.09222
NOSTRIN	null	NOSTRIN	nitric oxide synthase trafficker	1.08861
AMPD3	null	AMPD3	adenosine monophosphate deaminase (isoform E)	1.08202
CAR13	null	null	null	1.07903
CPM	null	CPM	carboxypeptidase M	1.07789
2310016A09RIK	null	null	null	1.07323
MYO7B	null	MYO7B	myosin VIIB	1.06966
MEIS1	null	MEIS1	Meis1, myeloid ecotropic viral integration site 1 homolog (mouse)	1.06898
TINAG	null	TINAG	tubulointerstitial nephritis antigen	1.05787
C1QC	null	C1QC	complement component 1, q subcomponent, C chain	1.05608
KLF4	null	KLF4	Kruppel-like factor 4 (gut)	1.05442
ITGB3	null	ITGB3	integrin, beta 3 (platelet glycoprotein IIIa, antigen CD61)	1.04061
ST8SIA6	null	ST8SIA6	ST8 alpha-N-acetyl-neuraminide alpha-2,8-sialyltransferase 6	1.03962
6230424C14RIK	null	null	null	1.0315
MS4A11	null	null	null	1.03034
CTLA2A /// CTLA2B	null	null	null	1.02961
SEPP1	null	SEPP1	selenoprotein P, plasma, 1	1.02741
SERINC5	null	SERINC5	serine incorporator 5	1.02465
TMEM79	null	TMEM79	transmembrane protein 79	1.02448
9530018H14RIK	null	null	null	1.02234
ABCB1A	null	null	null	1.01504
CEACAM1 /// CEACAM2	null	null	null	1.01075
1110036O03RIK	null	null	null	1.01015
0610040J01RIK	null	null	null	1.00985
ITIH2	null	ITIH2	inter-alpha (globulin) inhibitor H2	1.00363
DSP	null	DSP	desmoplakin	1.0025
RGL1	null	RGL1	ral guanine nucleotide dissociation stimulator-like 1	0.999198
COTL1	null	COTL1	coactosin-like 1 (Dictyostelium)	0.995024
CDH9	null	CDH9	cadherin 9, type 2 (T1-cadherin)	0.993989
CCL6	null	null	null	0.985027
SEMA3B	null	SEMA3B	sema domain, immunoglobulin domain (Ig), short basic domain, secreted, (semaphorin) 3B	0.98186
NCAM1	null	NCAM1	neural cell adhesion molecule 1	0.981742
CYP3A13	null	null	null	0.977586
ACTG2	null	ACTG2	actin, gamma 2, smooth muscle, enteric	0.976738
KALRN	null	KALRN	kalirin, RhoGEF kinase	0.975945
RBM12B	null	RBM12B	RNA binding motif protein 12B	0.974484
IFI27	null	IFI27	interferon, alpha-inducible protein 27	0.97174
9630020C08RIK /// LO	null	null	null	0.971289
BCL2A1A /// BCL2A1B	null	null	null	0.969504
CTSE	null	CTSE	cathepsin E	0.967627
AI663975	null	null	null	0.966978
CERKL	null	CERKL	ceramide kinase-like	0.96453
MFAP5	null	MFAP5	microfibrillar associated protein 5	0.962769
DECR1	null	DECR1	2,4-dienoyl CoA reductase 1, mitochondrial	0.960505
OCLN	null	OCLN	occludin	0.96018
IRX3	null	IRX3	iroquois homeobox protein 3	0.95602
4833423E24RIK	null	null	null	0.954444
DCN	null	DCN	decorin	0.951402
FBN1	null	FBN1	fibrillin 1	0.950613
ENPP2	null	ENPP2	ectonucleotide pyrophosphatase/phosphodiesterase 2 (autotaxin)	0.945959
BICC1	null	BICC1	bicaudal C homolog 1 (Drosophila)	0.94477
PCDHB16	null	PCDHB16	protocadherin beta 16	0.942605
MUCDHL	null	MUCDHL	mucin and cadherin-like	0.934185
GMFG	null	GMFG	glia maturation factor, gamma	0.933476
ST3GAL1	null	ST3GAL1	ST3 beta-galactoside alpha-2,3-sialyltransferase 1	0.930612
LUM	null	LUM	lumican	0.928304
ANKRD15	null	ANKRD15	ankyrin repeat domain 15	0.92537
DMD	null	DMD	dystrophin (muscular dystrophy, Duchenne and Becker types)	0.923632
MSRB2	null	MSRB2	methionine sulfoxide reductase B2	0.920992
EDG2	null	EDG2	endothelial differentiation, lysophosphatidic acid G-protein-coupled receptor, 2	0.913134
SLC40A1	null	SLC40A1	solute carrier family 40 (iron-regulated transporter), member 1	0.911908
C330018K18RIK	null	null	null	0.907815
FBLN5	null	FBLN5	fibulin 5	0.902679
IL5	null	IL5	interleukin 5 (colony-stimulating factor, eosinophil)	0.902613
EPHX1	null	EPHX1	epoxide hydrolase 1, microsomal (xenobiotic)	0.900862
4930533K18RIK /// BI	null	null	null	0.897823
CSPG4	null	CSPG4	chondroitin sulfate proteoglycan 4 (melanoma-associated)	0.896088
MGC29393	null	null	null	0.894145
A130040M12RIK	null	null	null	0.891435
2810055F11RIK	null	null	null	0.887237
AI843639	null	null	null	0.884205
HBA-A1	null	null	null	0.878642
UGT1A2 /// UGT1A6A /	null	null	null	0.878517
GPR85	null	GPR85	G protein-coupled receptor 85	0.873305
RAMP1	null	RAMP1	receptor (calcitonin) activity modifying protein 1	0.871669
KCNK6	null	KCNK6	potassium channel, subfamily K, member 6	0.867183
IGK-V28 /// 2010205A	null	null	null	0.864101
METTL7B	null	METTL7B	methyltransferase like 7B	0.860963
CGREF1	null	CGREF1	cell growth regulator with EF-hand domain 1	0.860635
CFI	null	CFI	complement factor I	0.859298
AQP1	null	AQP1	aquaporin 1 (Colton blood group)	0.857379
THY1	null	THY1	Thy-1 cell surface antigen	0.855746
ITGA4	null	ITGA4	integrin, alpha 4 (antigen CD49D, alpha 4 subunit of VLA-4 receptor)	0.853975
MS4A6D	null	null	null	0.853095
C79130	null	null	null	0.853026
CFH	null	CFH	complement factor H	0.852539
TMEM14A	null	TMEM14A	transmembrane protein 14A	0.850217
GHR	null	GHR	growth hormone receptor	0.849075
AW112010	null	null	null	0.848727
NEDD10	null	NEDD10	neural precursor cell expressed, developmentally down-regulated 10	0.847614
TUBB2B	null	TUBB2B	tubulin, beta 2B	0.845502
KRT1-13	null	null	null	0.843351
ASPA	null	ASPA	aspartoacylase (Canavan disease)	0.840075
GM98	null	null	null	0.838656
C1S	null	C1S	complement component 1, s subcomponent	0.838481
PTGES	null	PTGES	prostaglandin E synthase	0.831039
AI452195	null	null	null	0.828967
PIK3R3	null	PIK3R3	phosphoinositide-3-kinase, regulatory subunit 3 (p55, gamma)	0.822969
MYH1	null	MYH1	myosin, heavy chain 1, skeletal muscle, adult	0.821428
NTN4	null	NTN4	netrin 4	0.819358
B130021B11RIK	null	null	null	0.819074
HMGCS2	null	HMGCS2	3-hydroxy-3-methylglutaryl-Coenzyme A synthase 2 (mitochondrial)	0.813277
ARL14	null	ARL14	ADP-ribosylation factor-like 14	0.812408
FGD4	null	FGD4	FYVE, RhoGEF and PH domain containing 4	0.810893
IFI205 /// MNDA	null	null	null	0.809796
H2-AB1	null	null	null	0.809211
4930509E16RIK	null	null	null	0.806969
TTYH2	null	TTYH2	tweety homolog 2 (Drosophila)	0.806897
VIL1	null	VIL1	villin 1	0.803753
IDH1	null	IDH1	isocitrate dehydrogenase 1 (NADP+), soluble	0.803311
AI427122	null	null	null	0.802649
STXBP6	null	STXBP6	syntaxin binding protein 6 (amisyn)	0.797419
TSPAN12	null	TSPAN12	tetraspanin 12	0.796414
GSTM4	null	GSTM4	glutathione S-transferase M4	0.796286
RORB	null	RORB	RAR-related orphan receptor B	0.795163
MS4A6B	null	null	null	0.794886
HEBP1	null	HEBP1	heme binding protein 1	0.793845
ENPP5	null	ENPP5	ectonucleotide pyrophosphatase/phosphodiesterase 5 (putative function)	0.792889
TYROBP	null	TYROBP	TYRO protein tyrosine kinase binding protein	0.791267
5430421B17	null	null	null	0.790457
HNF4A	null	HNF4A	hepatocyte nuclear factor 4, alpha	0.790166
BC040758	null	null	null	0.789603
2610036F08RIK	null	null	null	0.788718
RGS2	null	RGS2	regulator of G-protein signalling 2, 24kDa	0.786974
9230117N10RIK	null	null	null	0.785716
CCL8	null	CCL8	chemokine (C-C motif) ligand 8	0.784127
DIRC2	null	DIRC2	disrupted in renal carcinoma 2	0.782875
SALL2	null	SALL2	sal-like 2 (Drosophila)	0.782205
MYO6	null	MYO6	myosin VI	0.781778
MCPT1	null	null	null	0.780354
PRKCDBP	null	PRKCDBP	protein kinase C, delta binding protein	0.779835
2810451A06RIK	null	null	null	0.778689
NAP1L3	null	NAP1L3	nucleosome assembly protein 1-like 3	0.77813
IIGP1	null	null	null	0.776786
MYO1B	null	MYO1B	myosin IB	0.775103
HRH1	null	HRH1	histamine receptor H1	0.77362
TSPAN6	null	TSPAN6	tetraspanin 6	0.773561
TNFRSF18	null	TNFRSF18	tumor necrosis factor receptor superfamily, member 18	0.771095
RAB27A	null	RAB27A	RAB27A, member RAS oncogene family	0.770384
TACSTD1	null	TACSTD1	tumor-associated calcium signal transducer 1	0.768795
CTLA2B	null	null	null	0.768188
PMP22	null	PMP22	peripheral myelin protein 22	0.765871
LOC433270	null	null	null	0.764905
0610040B10RIK	null	null	null	0.763325
ARRB1	null	ARRB1	arrestin, beta 1	0.763087
FSTL1	null	FSTL1	follistatin-like 1	0.760654
CCDC80	null	CCDC80	coiled-coil domain containing 80	0.75969
EGLN3	null	EGLN3	egl nine homolog 3 (C. elegans)	0.757558
PTPN22	null	PTPN22	protein tyrosine phosphatase, non-receptor type 22 (lymphoid)	0.755942
FZD4	null	FZD4	frizzled homolog 4 (Drosophila)	0.75545
CAR9	null	null	null	0.752401
DHRS10	null	DHRS10	dehydrogenase/reductase (SDR family) member 10	0.750128
S100A14	null	S100A14	S100 calcium binding protein A14	0.747537
SPON1	null	SPON1	spondin 1, extracellular matrix protein	0.747352
ITGB4	null	ITGB4	integrin, beta 4	0.747108
A930041H05RIK	null	null	null	0.747014
ZFP40	null	null	null	0.746672
2010315B03RIK	null	null	null	0.745662
MYCL1	null	MYCL1	v-myc myelocytomatosis viral oncogene homolog 1, lung carcinoma derived (avian)	0.740248
CYP2C55	null	null	null	0.73933
EGR2	null	EGR2	early growth response 2 (Krox-20 homolog, Drosophila)	0.73922
JARID1B	null	JARID1B	jumonji, AT rich interactive domain 1B	0.738837
CYP2S1	null	CYP2S1	cytochrome P450, family 2, subfamily S, polypeptide 1	0.736249
LRP1	null	LRP1	low density lipoprotein-related protein 1 (alpha-2-macroglobulin receptor)	0.735897
H2-DMB1	null	null	null	0.735184
FCGR3A	null	FCGR3A	Fc fragment of IgG, low affinity IIIa, receptor (CD16a)	0.735138
PLCL2	null	PLCL2	phospholipase C-like 2	0.731313
TNXB	null	TNXB	tenascin XB	0.727835
AMHR2	null	AMHR2	anti-Mullerian hormone receptor, type II	0.727712
CXCL15	null	null	null	0.727672
FBXO32	null	FBXO32	F-box protein 32	0.726742
BMP2	null	BMP2	bone morphogenetic protein 2	0.725486
C1R /// LOC667277 //	null	null	null	0.723032
TGTP	null	null	null	0.721777
ZBTB4	null	ZBTB4	zinc finger and BTB domain containing 4	0.720222
EPB4.1L5	null	null	null	0.719355
CCL12	null	null	null	0.719343
1300007C21RIK /// LO	null	null	null	0.719252
SPRY1	null	SPRY1	sprouty homolog 1, antagonist of FGF signaling (Drosophila)	0.717797
ARHGEF16	null	ARHGEF16	Rho guanine exchange factor (GEF) 16	0.715406
RASA4	null	RASA4	RAS p21 protein activator 4	0.711156
SULF1	null	SULF1	sulfatase 1	0.710661
MERTK	null	MERTK	c-mer proto-oncogene tyrosine kinase	0.706545
FBP2	null	FBP2	fructose-1,6-bisphosphatase 2	0.704687
CLEC2D	null	CLEC2D	C-type lectin domain family 2, member D	0.70467
WNK4	null	WNK4	WNK lysine deficient protein kinase 4	0.702605
NOV	null	NOV	nephroblastoma overexpressed gene	0.700149
AW548124	null	null	null	0.694646
A730009E18RIK	null	null	null	0.691815
IL2RG	null	IL2RG	interleukin 2 receptor, gamma (severe combined immunodeficiency)	0.688948
CEBPD	null	CEBPD	CCAAT/enhancer binding protein (C/EBP), delta	0.688847
BC046404	null	null	null	0.688298
B130052G07RIK	null	null	null	0.688157
FBLIM1	null	FBLIM1	filamin binding LIM protein 1	0.686696
MFSD2	null	MFSD2	major facilitator superfamily domain containing 2	0.682482
SDCBP2	null	SDCBP2	syndecan binding protein (syntenin) 2	0.682476
LPXN	null	LPXN	leupaxin	0.679444
1200002N14RIK	null	null	null	0.676733
GSTA4	null	GSTA4	glutathione S-transferase A4	0.67657
SYTL2	null	SYTL2	synaptotagmin-like 2	0.675786
RKHD3	null	RKHD3	ring finger and KH domain containing 3	0.673391
MYO15B	null	MYO15B	myosin XVB pseudogene	0.67141
CFB	null	CFB	complement factor B	0.670809
CLEC4N	null	null	null	0.669436
C030038J10RIK	null	null	null	0.668587
MAP4K1 /// LOC672367	null	null	null	0.667686
HBB-B1 /// HBB-B2	null	null	null	0.667254
GRID2	null	GRID2	glutamate receptor, ionotropic, delta 2	0.66519
ETOHI1 /// 6230416C0	null	null	null	0.663994
CD1D1	null	null	null	0.66341
1200003I10RIK /// 12	null	null	null	0.662046
LOC434147	null	null	null	0.660165
PPARGC1B	null	PPARGC1B	peroxisome proliferative activated receptor, gamma, coactivator 1, beta	0.657294
ACOT11	null	ACOT11	acyl-CoA thioesterase 11	0.656877
NSUN6	null	NSUN6	NOL1/NOP2/Sun domain family, member 6	0.65606
CEACAM1	null	CEACAM1	carcinoembryonic antigen-related cell adhesion molecule 1 (biliary glycoprotein)	0.655501
3110047M12RIK	null	null	null	0.655357
RNASEL	null	RNASEL	ribonuclease L (2',5'-oligoisoadenylate synthetase-dependent)	0.655161
QSCN6	null	QSCN6	quiescin Q6	0.654352
LTB4DH	null	LTB4DH	leukotriene B4 12-hydroxydehydrogenase	0.653531
PYGL	null	PYGL	phosphorylase, glycogen; liver (Hers disease, glycogen storage disease type VI)	0.653413
GNG11	null	GNG11	guanine nucleotide binding protein (G protein), gamma 11	0.653116
COX7A1	null	COX7A1	cytochrome c oxidase subunit VIIa polypeptide 1 (muscle)	0.652326
PF4	null	PF4	platelet factor 4 (chemokine (C-X-C motif) ligand 4)	0.651337
LOC676640	null	null	null	0.649582
SYT7	null	SYT7	synaptotagmin VII	0.649412
2810408A11RIK	null	null	null	0.64928
DDC	null	DDC	dopa decarboxylase (aromatic L-amino acid decarboxylase)	0.646049
LPL	null	LPL	lipoprotein lipase	0.645348
SH3YL1	null	SH3YL1	SH3 domain containing, Ysc84-like 1 (S. cerevisiae)	0.645188
CDC42EP2	null	CDC42EP2	CDC42 effector protein (Rho GTPase binding) 2	0.644998
TRP53INP1	null	null	null	0.644556
LOXL1	null	LOXL1	lysyl oxidase-like 1	0.643769
MUC1	null	MUC1	mucin 1, cell surface associated	0.642354
COL6A1	null	COL6A1	collagen, type VI, alpha 1	0.641315
RND2	null	RND2	Rho family GTPase 2	0.64122
XLR /// 3830403N18RI	null	null	null	0.641112
ALDH1B1	null	ALDH1B1	aldehyde dehydrogenase 1 family, member B1	0.639847
HERC3	null	HERC3	hect domain and RLD 3	0.638749
C330008K14RIK	null	null	null	0.637997
2310037P21RIK	null	null	null	0.636772
PALLD	null	PALLD	palladin, cytoskeletal associated protein	0.63657
H2-AA	null	null	null	0.635943
HSD17B7	null	HSD17B7	hydroxysteroid (17-beta) dehydrogenase 7	0.634933
CD53	null	CD53	CD53 molecule	0.632952
ORM1	null	ORM1	orosomucoid 1	0.632946
CMA1	null	CMA1	chymase 1, mast cell	0.632553
FBXL2	null	FBXL2	F-box and leucine-rich repeat protein 2	0.630906
D330040H18RIK	null	null	null	0.62751
CST6	null	CST6	cystatin E/M	0.627277
BTBD6	null	BTBD6	BTB (POZ) domain containing 6	0.626639
BDH2	null	BDH2	3-hydroxybutyrate dehydrogenase, type 2	0.625007
LGR4 /// LOC669588	null	null	null	0.622179
PTGS1	null	PTGS1	prostaglandin-endoperoxide synthase 1 (prostaglandin G/H synthase and cyclooxygenase)	0.617411
LBH	null	LBH	-	0.616697
CTHRC1	null	CTHRC1	collagen triple helix repeat containing 1	0.61455
F13A1	null	F13A1	coagulation factor XIII, A1 polypeptide	0.614425
CENTD3	null	CENTD3	centaurin, delta 3	0.614227
4833405L16RIK	null	null	null	0.611665
DDIT4	null	DDIT4	DNA-damage-inducible transcript 4	0.61141
PPP1R14A	null	PPP1R14A	protein phosphatase 1, regulatory (inhibitor) subunit 14A	0.610796
C630007C17RIK	null	null	null	0.610708
FOXF2	null	FOXF2	forkhead box F2	0.609949
EVA1	null	EVA1	epithelial V-like antigen 1	0.608686
MTUS1	null	MTUS1	mitochondrial tumor suppressor 1	0.608667
AIG1	null	AIG1	androgen-induced 1	0.604001
MAP2K6	null	MAP2K6	mitogen-activated protein kinase kinase 6	0.603719
MTMR11	null	MTMR11	myotubularin related protein 11	0.602905
ADAMTS1	null	ADAMTS1	ADAM metallopeptidase with thrombospondin type 1 motif, 1	0.6006
LOC432995	null	null	null	0.599502
PLAC9	null	PLAC9	placenta-specific 9	0.599409
PPARGC1A	null	PPARGC1A	peroxisome proliferative activated receptor, gamma, coactivator 1, alpha	0.599039
3930401B19RIK /// 12	null	null	null	0.597843
FHL2	null	FHL2	four and a half LIM domains 2	0.597722
HOXB5	null	HOXB5	homeobox B5	0.594387
TNNT1	null	TNNT1	troponin T type 1 (skeletal, slow)	0.593718
DEPDC6	null	DEPDC6	DEP domain containing 6	0.593707
SPATA6	null	SPATA6	spermatogenesis associated 6	0.593677
TMEM141	null	TMEM141	transmembrane protein 141	0.593208
ADAMTS4	null	ADAMTS4	ADAM metallopeptidase with thrombospondin type 1 motif, 4	0.593073
NPAL1	null	NPAL1	NIPA-like domain containing 1	0.590912
5330426P16RIK	null	null	null	0.590797
NUDT7	null	NUDT7	nudix (nucleoside diphosphate linked moiety X)-type motif 7	0.590091
2210023G05RIK	null	null	null	0.588032
DMN	null	DMN	desmuslin	0.587339
1110033F14RIK	null	null	null	0.587002
DBN1	null	DBN1	drebrin 1	0.586193
RYR2	null	RYR2	ryanodine receptor 2 (cardiac)	0.58521
PCDH7	null	PCDH7	BH-protocadherin (brain-heart)	0.58392
DNAJB13	null	DNAJB13	DnaJ (Hsp40) related, subfamily B, member 13	0.583854
1200015M12RIK /// 12	null	null	null	0.581923
TIFA	null	TIFA	-	0.581786
CAPG	null	CAPG	capping protein (actin filament), gelsolin-like	0.580099
SULT1A1	null	SULT1A1	sulfotransferase family, cytosolic, 1A, phenol-preferring, member 1	0.577486
STEAP4	null	STEAP4	STEAP family member 4	0.577222
TMEM51	null	TMEM51	transmembrane protein 51	0.576114
AFP	null	AFP	alpha-fetoprotein	0.575924
BC014699	null	null	null	0.575724
CDH2	null	CDH2	cadherin 2, type 1, N-cadherin (neuronal)	0.575657
RASSF2	null	RASSF2	Ras association (RalGDS/AF-6) domain family 2	0.575606
2410076I21RIK	null	null	null	0.574782
VAT1	null	VAT1	vesicle amine transport protein 1 homolog (T californica)	0.573002
MMP12	null	MMP12	matrix metallopeptidase 12 (macrophage elastase)	0.572464
CD74	null	CD74	CD74 molecule, major histocompatibility complex, class II invariant chain	0.571774
A230061C15RIK	null	null	null	0.571476
CABP4	null	CABP4	calcium binding protein 4	0.571198
AGTRL1	null	AGTRL1	angiotensin II receptor-like 1	0.568106
4831426I19RIK	null	null	null	0.567301
MAOB	null	MAOB	monoamine oxidase B	0.566319
SMPDL3A	null	SMPDL3A	sphingomyelin phosphodiesterase, acid-like 3A	0.566124
INSL6	null	INSL6	insulin-like 6	0.565345
A630005I04RIK	null	null	null	0.564602
AU015536	null	null	null	0.563905
SERPING1	null	SERPING1	serpin peptidase inhibitor, clade G (C1 inhibitor), member 1, (angioedema, hereditary)	0.56325
ANXA13	null	ANXA13	annexin A13	0.562045
TRIOBP	null	TRIOBP	TRIO and F-actin binding protein	0.561857
H2-D1 /// H2-K1 ///	null	null	null	0.561699
IRS1	null	IRS1	insulin receptor substrate 1	0.560926
2310016F22RIK /// BC	null	null	null	0.560593
RAB38	null	RAB38	RAB38, member RAS oncogene family	0.560543
ALDH1A3	null	ALDH1A3	aldehyde dehydrogenase 1 family, member A3	0.560106
PRMT6	null	PRMT6	protein arginine methyltransferase 6	0.560088
LOC245128	null	null	null	0.559954
CSF1R	null	CSF1R	colony stimulating factor 1 receptor, formerly McDonough feline sarcoma viral (v-fms) oncogene homolog	0.557047
1810023F06RIK	null	null	null	0.554668
BC022623	null	null	null	0.553577
TRFR2	null	null	null	0.553244
CYP4F13	null	null	null	0.552165
LY6C	null	null	null	0.551457
NEU1	null	NEU1	sialidase 1 (lysosomal sialidase)	0.551106
E330016A19RIK	null	null	null	0.550627
SETD8	null	SETD8	SET domain containing (lysine methyltransferase) 8	0.549351
EPS8L3	null	EPS8L3	EPS8-like 3	0.545711
ACAD11	null	ACAD11	acyl-Coenzyme A dehydrogenase family, member 11	0.5447
KLK3	null	KLK3	kallikrein 3, (prostate specific antigen)	0.544632
EVPL	null	EVPL	envoplakin	0.544254
AP1S3	null	AP1S3	adaptor-related protein complex 1, sigma 3 subunit	0.543063
4631416L12RIK	null	null	null	0.542253
CLIC6	null	CLIC6	chloride intracellular channel 6	0.541912
ECHDC2	null	ECHDC2	enoyl Coenzyme A hydratase domain containing 2	0.541577
H2-EB1	null	null	null	0.541131
PCDHB9	null	PCDHB9	protocadherin beta 9	0.540441
OPTN	null	OPTN	optineurin	0.538662
NDG2	null	null	null	0.538509
NDRG1	null	NDRG1	N-myc downstream regulated gene 1	0.537801
COL1A1	null	COL1A1	collagen, type I, alpha 1	0.537713
ZFP110	null	null	null	0.53609
IPF1	null	IPF1	insulin promoter factor 1, homeodomain transcription factor	0.535819
SYNE1	null	SYNE1	spectrin repeat containing, nuclear envelope 1	0.53412
ALOX5AP	null	ALOX5AP	arachidonate 5-lipoxygenase-activating protein	0.532688
LINCR	null	LINCR	-	0.531888
WFDC1	null	WFDC1	WAP four-disulfide core domain 1	0.530103
BC023105	null	null	null	0.530025
C330006P03RIK	null	null	null	0.529974
TCFCP2L1	null	null	null	0.528258
H2-DMB1 /// H2-DMB2	null	null	null	0.527217
EHF	null	EHF	ets homologous factor	0.526869
GPD1	null	GPD1	glycerol-3-phosphate dehydrogenase 1 (soluble)	0.524245
DUSP10	null	DUSP10	dual specificity phosphatase 10	0.521147
ZFP455	null	null	null	0.520194
GNN	null	null	null	0.520047
BC026600	null	null	null	0.519916
PBXIP1	null	PBXIP1	pre-B-cell leukemia transcription factor interacting protein 1	0.518171
TRIM34	null	TRIM34	tripartite motif-containing 34	0.518137
TMEM86A	null	TMEM86A	transmembrane protein 86A	0.517106
LOC668101	null	null	null	0.515102
ANKRD37	null	ANKRD37	ankyrin repeat domain 37	0.514645
RAB17	null	RAB17	RAB17, member RAS oncogene family	0.512218
NIN	null	NIN	ninein (GSK3B interacting protein)	0.511077
ATG10	null	ATG10	ATG10 autophagy related 10 homolog (S. cerevisiae)	0.510938
KLHL24	null	KLHL24	kelch-like 24 (Drosophila)	0.510734
TRAK2	null	TRAK2	trafficking protein, kinesin binding 2	0.506919
LOC434536	null	null	null	0.506259
OSMR	null	OSMR	oncostatin M receptor	0.505888
BMYC	null	null	null	0.50583
UEVLD	null	UEVLD	UEV and lactate/malate dehyrogenase domains	0.504324
VAV3	null	VAV3	vav 3 oncogene	0.503832
CNKSR2	null	CNKSR2	connector enhancer of kinase suppressor of Ras 2	0.503589
GBP1	null	GBP1	guanylate binding protein 1, interferon-inducible, 67kDa	0.50165
OASL1	null	null	null	0.50097
CHN2	null	CHN2	chimerin (chimaerin) 2	0.5001
PHYHD1 /// LRRC8A	null	null	null	0.498931
B230216N24RIK	null	null	null	0.49874
AI503564	null	null	null	0.498035
C730009D12	null	null	null	0.497974
6720475J19RIK /// LO	null	null	null	0.4972
OLR1	null	OLR1	oxidised low density lipoprotein (lectin-like) receptor 1	0.496796
IFI203	null	null	null	0.496721
AGRIN	null	AGRIN	agrin	0.496335
IFITM1	null	IFITM1	interferon induced transmembrane protein 1 (9-27)	0.495798
TIGD2	null	TIGD2	tigger transposable element derived 2	0.494788
MMP10	null	MMP10	matrix metallopeptidase 10 (stromelysin 2)	0.493871
A830082K12RIK	null	null	null	0.492943
B4GALT4	null	B4GALT4	UDP-Gal:betaGlcNAc beta 1,4- galactosyltransferase, polypeptide 4	0.491839
ITGA7	null	ITGA7	integrin, alpha 7	0.491582
BNIP3	null	BNIP3	BCL2/adenovirus E1B 19kDa interacting protein 3	0.490155
LOC666185 /// LOC666	null	null	null	0.489405
KRTDAP	null	KRTDAP	keratinocyte differentiation-associated protein	0.489233
PDZRN3	null	PDZRN3	PDZ domain containing RING finger 3	0.488641
CIDEB	null	CIDEB	cell death-inducing DFFA-like effector b	0.488526
LBP	null	LBP	lipopolysaccharide binding protein	0.488104
HMGCS1	null	HMGCS1	3-hydroxy-3-methylglutaryl-Coenzyme A synthase 1 (soluble)	0.487952
LOC675709	null	null	null	0.48759
FAH	null	FAH	fumarylacetoacetate hydrolase (fumarylacetoacetase)	0.486621
P2RX4	null	P2RX4	purinergic receptor P2X, ligand-gated ion channel, 4	0.485709
1300003B13RIK	null	null	null	0.485624
NAV3	null	NAV3	neuron navigator 3	0.483518
2700038N03RIK	null	null	null	0.483427
IL15	null	IL15	interleukin 15	0.483334
1700022C21RIK	null	null	null	0.483172
RAPH1	null	RAPH1	Ras association (RalGDS/AF-6) and pleckstrin homology domains 1	0.483152
NTS	null	NTS	neurotensin	0.482827
MTMR7	null	MTMR7	myotubularin related protein 7	0.480432
GSTA2	null	GSTA2	glutathione S-transferase A2	0.478805
PLAT	null	PLAT	plasminogen activator, tissue	0.478519
DHCR24	null	DHCR24	24-dehydrocholesterol reductase	0.476947
SLCO4A1	null	SLCO4A1	solute carrier organic anion transporter family, member 4A1	0.476315
2310033F14RIK	null	null	null	0.476295
STC2	null	STC2	stanniocalcin 2	0.475942
HMGCR	null	HMGCR	3-hydroxy-3-methylglutaryl-Coenzyme A reductase	0.474734
DBP	null	DBP	D site of albumin promoter (albumin D-box) binding protein	0.474567
ARNTL	null	ARNTL	aryl hydrocarbon receptor nuclear translocator-like	0.473834
D5ERTD593E	null	null	null	0.473353
ACP5	null	ACP5	acid phosphatase 5, tartrate resistant	0.473343
INHBB	null	INHBB	inhibin, beta B (activin AB beta polypeptide)	0.472686
TNFAIP6	null	TNFAIP6	tumor necrosis factor, alpha-induced protein 6	0.47238
KLC4	null	KLC4	kinesin light chain 4	0.471537
RTKN	null	RTKN	rhotekin	0.4705
4930405M20RIK	null	null	null	0.469144
TNFRSF1B	null	TNFRSF1B	tumor necrosis factor receptor superfamily, member 1B	0.468787
2210016H18RIK	null	null	null	0.467973
ADAMTS15	null	ADAMTS15	ADAM metallopeptidase with thrombospondin type 1 motif, 15	0.467628
5730593F17RIK	null	null	null	0.466459
1810014F10RIK	null	null	null	0.466419
ATG16L2	null	ATG16L2	ATG16 autophagy related 16-like 2 (S. cerevisiae)	0.465909
NDN	null	NDN	necdin homolog (mouse)	0.464627
CXCL1	null	CXCL1	chemokine (C-X-C motif) ligand 1 (melanoma growth stimulating activity, alpha)	0.464493
BCL2	null	BCL2	B-cell CLL/lymphoma 2	0.464354
0710001D07RIK	null	null	null	0.462782
MPPE1	null	MPPE1	metallophosphoesterase 1	0.462348
TTC26	null	TTC26	tetratricopeptide repeat domain 26	0.461893
SYNGR1	null	SYNGR1	synaptogyrin 1	0.461685
BCL6	null	BCL6	B-cell CLL/lymphoma 6 (zinc finger protein 51)	0.461464
SFTPB	null	SFTPB	surfactant, pulmonary-associated protein B	0.460691
2810002D19RIK	null	null	null	0.460192
TPSAB1	null	TPSAB1	tryptase alpha/beta 1	0.459682
ATAD4	null	ATAD4	ATPase family, AAA domain containing 4	0.459242
5830436I19RIK	null	null	null	0.459183
NEU3	null	NEU3	sialidase 3 (membrane sialidase)	0.458089
B4GALT6 /// LOC67570	null	null	null	0.457696
1190002H23RIK	null	null	null	0.457585
PLEK	null	PLEK	pleckstrin	0.456869
RASL11A	null	RASL11A	RAS-like, family 11, member A	0.456745
9930031P18RIK	null	null	null	0.456637
IFI203 /// IFI204 //	null	null	null	0.456208
PDE2A	null	PDE2A	phosphodiesterase 2A, cGMP-stimulated	0.455704
TRP53INP2	null	null	null	0.454767
9030611O19RIK	null	null	null	0.454707
C920009B18RIK	null	null	null	0.454157
WDR54	null	WDR54	WD repeat domain 54	0.453426
KLHL5	null	KLHL5	kelch-like 5 (Drosophila)	0.453315
TMEM135	null	TMEM135	transmembrane protein 135	0.452693
SLIT2	null	SLIT2	slit homolog 2 (Drosophila)	0.452654
2310076G05RIK	null	null	null	0.452175
ZFP27	null	null	null	0.452128
CDKN2A	null	CDKN2A	cyclin-dependent kinase inhibitor 2A (melanoma, p16, inhibits CDK4)	0.451735
EML2	null	EML2	echinoderm microtubule associated protein like 2	0.45096
A530094I17RIK	null	null	null	0.450506
CLYBL	null	CLYBL	citrate lyase beta like	0.449976
C030027H14RIK	null	null	null	0.449916
ENPP1	null	ENPP1	ectonucleotide pyrophosphatase/phosphodiesterase 1	0.449238
STC1	null	STC1	stanniocalcin 1	0.449048
NDRL	null	null	null	0.448686
D330010C22RIK	null	null	null	0.447819
DSG2	null	DSG2	desmoglein 2	0.44719
SPON2	null	SPON2	spondin 2, extracellular matrix protein	0.447181
6030451C04RIK	null	null	null	0.446502
2310009B15RIK	null	null	null	0.446341
FAP	null	FAP	fibroblast activation protein, alpha	0.446101
LIMK1	null	LIMK1	LIM domain kinase 1	0.445666
ZFP184	null	null	null	0.445161
5830467E07RIK	null	null	null	0.444997
TLR1	null	TLR1	toll-like receptor 1	0.444043
CXXC4	null	CXXC4	CXXC finger 4	0.443434
2210409B22RIK	null	null	null	0.4424
E130201N16RIK	null	null	null	0.441993
C3	null	C3	complement component 3	0.44171
TAGLN	null	TAGLN	transgelin	0.440958
VAPB	null	VAPB	VAMP (vesicle-associated membrane protein)-associated protein B and C	0.440564
LAPTM4B	null	LAPTM4B	lysosomal associated protein transmembrane 4 beta	0.439826
LGALS4	null	LGALS4	lectin, galactoside-binding, soluble, 4 (galectin 4)	0.439583
0610037D15RIK	null	null	null	0.439513
COL6A3 /// LOC674521	null	null	null	0.439124
AA467197	null	null	null	0.43904
9630009C16	null	null	null	0.438582
SLC7A7	null	SLC7A7	solute carrier family 7 (cationic amino acid transporter, y+ system), member 7	0.43762
PLEKHO1	null	PLEKHO1	pleckstrin homology domain containing, family O member 1	0.437278
GDA	null	GDA	guanine deaminase	0.437145
9130024F11RIK	null	null	null	0.435648
LOC270335 /// LOC434	null	null	null	0.435575
2900064B18RIK	null	null	null	0.434234
2310015N07RIK	null	null	null	0.434069
4632417N05RIK	null	null	null	0.433753
JARID1D	null	JARID1D	jumonji, AT rich interactive domain 1D	0.433325
GCNT1	null	GCNT1	glucosaminyl (N-acetyl) transferase 1, core 2 (beta-1,6-N-acetylglucosaminyltransferase)	0.433061
DAB2	null	DAB2	disabled homolog 2, mitogen-responsive phosphoprotein (Drosophila)	0.432781
BC006779	null	null	null	0.43265
MLPH	null	MLPH	melanophilin	0.432105
MPEG1 /// LOC671359	null	null	null	0.431139
ARRDC3	null	ARRDC3	arrestin domain containing 3	0.430379
LGI2	null	LGI2	leucine-rich repeat LGI family, member 2	0.429863
RORC	null	RORC	RAR-related orphan receptor C	0.429694
NAV1	null	NAV1	neuron navigator 1	0.429667
GCH1	null	GCH1	GTP cyclohydrolase 1 (dopa-responsive dystonia)	0.429423
KIRREL3	null	KIRREL3	kin of IRRE like 3 (Drosophila)	0.428877
RBP2	null	RBP2	retinol binding protein 2, cellular	0.428701
8030447M02RIK	null	null	null	0.428137
DHCR7	null	DHCR7	7-dehydrocholesterol reductase	0.428078
2210416J07RIK	null	null	null	0.42724
ZFP703	null	null	null	0.425713
ZBTB8	null	ZBTB8	zinc finger and BTB domain containing 8	0.42559
SLC26A2	null	SLC26A2	solute carrier family 26 (sulfate transporter), member 2	0.425121
2700055K07RIK	null	null	null	0.424533
INSIG1	null	INSIG1	insulin induced gene 1	0.423903
SLC16A13	null	SLC16A13	solute carrier family 16, member 13 (monocarboxylic acid transporter 13)	0.423115
BC027061	null	null	null	0.422944
CENTD1	null	CENTD1	centaurin, delta 1	0.422911
RTN4IP1	null	RTN4IP1	reticulon 4 interacting protein 1	0.422877
4930456A14RIK	null	null	null	0.421967
AA986860	null	null	null	0.421703
NAGK	null	NAGK	N-acetylglucosamine kinase	0.421649
VWA1	null	VWA1	von Willebrand factor A domain containing 1	0.421353
MGP	null	MGP	matrix Gla protein	0.421262
ALDH1A7	null	null	null	0.420611
D230012E17RIK	null	null	null	0.420424
RGNEF	null	RGNEF	-	0.420038
RNF4	null	RNF4	ring finger protein 4	0.418976
SEMA6D	null	SEMA6D	sema domain, transmembrane domain (TM), and cytoplasmic domain, (semaphorin) 6D	0.418898
ARHGAP6	null	ARHGAP6	Rho GTPase activating protein 6	0.41783
TRIB2	null	TRIB2	tribbles homolog 2 (Drosophila)	0.417103
9530028C05	null	null	null	0.416976
MME	null	MME	membrane metallo-endopeptidase (neutral endopeptidase, enkephalinase)	0.416971
2610012C04RIK	null	null	null	0.416652
ADCK4	null	ADCK4	aarF domain containing kinase 4	0.416344
NR2F1	null	NR2F1	nuclear receptor subfamily 2, group F, member 1	0.415282
KCNE2	null	KCNE2	potassium voltage-gated channel, Isk-related family, member 2	0.414718
4933431E20RIK	null	null	null	0.413401
RCN3	null	RCN3	reticulocalbin 3, EF-hand calcium binding domain	0.41332
APOBEC1	null	APOBEC1	apolipoprotein B mRNA editing enzyme, catalytic polypeptide 1	0.413287
SLC25A1	null	SLC25A1	solute carrier family 25 (mitochondrial carrier; citrate transporter), member 1	0.41318
C630043F03RIK	null	null	null	0.410628
DQX1	null	DQX1	DEAQ box polypeptide 1 (RNA-dependent ATPase)	0.410273
KRT1-14	null	null	null	0.40963
TTR	null	TTR	transthyretin (prealbumin, amyloidosis type I)	0.40954
ANKS1B /// LOC544718	null	null	null	0.408946
NDRG1 /// NDRL	null	null	null	0.408632
NIT1	null	NIT1	nitrilase 1	0.408438
D0H4S114	null	null	null	0.408221
4933425L03RIK	null	null	null	0.408197
EFNA1	null	EFNA1	ephrin-A1	0.407751
METTL4	null	METTL4	methyltransferase like 4	0.407617
2017-03-03	null	2017-03-03	membrane-associated ring finger (C3HC4) 3	0.407538
XYLB	null	XYLB	xylulokinase homolog (H. influenzae)	0.406328
CIB1	null	CIB1	calcium and integrin binding 1 (calmyrin)	0.40623
C130069I09RIK	null	null	null	0.40594
DYRK2	null	DYRK2	dual-specificity tyrosine-(Y)-phosphorylation regulated kinase 2	0.405645
1110058L19RIK	null	null	null	0.405447
3110068G20RIK	null	null	null	0.404433
2810039B14RIK	null	null	null	0.404167
VLDLR	null	VLDLR	very low density lipoprotein receptor	0.403438
AW050198	null	null	null	0.403413
KREMEN1	null	KREMEN1	kringle containing transmembrane protein 1	0.403295
BC043476	null	null	null	0.402897
TCF7	null	TCF7	transcription factor 7 (T-cell specific, HMG-box)	0.402308
4832406H04RIK	null	null	null	0.40141
3010026O09RIK	null	null	null	0.401245
CRABP1	null	CRABP1	cellular retinoic acid binding protein 1	0.400838
NAV3 /// 9630020C08R	null	null	null	0.400766
FMO5	null	FMO5	flavin containing monooxygenase 5	0.400423
BIRC3	null	BIRC3	baculoviral IAP repeat-containing 3	0.400399
GRAMD1B	null	GRAMD1B	GRAM domain containing 1B	0.400286
TXNIP	null	TXNIP	thioredoxin interacting protein	0.399857
PIGC	null	PIGC	phosphatidylinositol glycan anchor biosynthesis, class C	0.399468
D14ERTD668E	null	null	null	0.399303
HLX1	null	HLX1	H2.0-like homeobox 1 (Drosophila)	0.399235
TPCN1	null	TPCN1	two pore segment channel 1	0.398635
3110057O12RIK	null	null	null	0.398508
MAP3K1	null	MAP3K1	mitogen-activated protein kinase kinase kinase 1	0.398428
C030003D03RIK	null	null	null	0.397701
UCP2	null	UCP2	uncoupling protein 2 (mitochondrial, proton carrier)	0.396974
4833406M21RIK	null	null	null	0.396929
NME3	null	NME3	non-metastatic cells 3, protein expressed in	0.396526
NRIP1	null	NRIP1	nuclear receptor interacting protein 1	0.396319
SEMA4C	null	SEMA4C	sema domain, immunoglobulin domain (Ig), transmembrane domain (TM) and short cytoplasmic domain, (semaphorin) 4C	0.39604
BMF	null	BMF	Bcl2 modifying factor	0.395986
CCPG1	null	CCPG1	cell cycle progression 1	0.395892
CYP4B1	null	CYP4B1	cytochrome P450, family 4, subfamily B, polypeptide 1	0.395607
SP8	null	SP8	Sp8 transcription factor	0.395601
CCDC68	null	CCDC68	coiled-coil domain containing 68	0.395539
RHOJ	null	RHOJ	ras homolog gene family, member J	0.395375
CYP39A1	null	CYP39A1	cytochrome P450, family 39, subfamily A, polypeptide 1	0.393538
ATF3	null	ATF3	activating transcription factor 3	0.392506
FLT1	null	FLT1	fms-related tyrosine kinase 1 (vascular endothelial growth factor/vascular permeability factor receptor)	0.391783
4930503E14RIK	null	null	null	0.39115
TSPAN1	null	TSPAN1	tetraspanin 1	0.390941
A930001N09RIK	null	null	null	0.390848
B430316J06RIK	null	null	null	0.389818
H2-AA /// H2-EA	null	null	null	0.389255
PARP8	null	PARP8	poly (ADP-ribose) polymerase family, member 8	0.387529
ENTPD5	null	ENTPD5	ectonucleoside triphosphate diphosphohydrolase 5	0.387123
2810433K01RIK	null	null	null	0.386952
CYP27A1	null	CYP27A1	cytochrome P450, family 27, subfamily A, polypeptide 1	0.386877
TOR1AIP2	null	TOR1AIP2	torsin A interacting protein 2	0.386683
CP	null	CP	ceruloplasmin (ferroxidase)	0.386499
CDX2	null	CDX2	caudal type homeobox transcription factor 2	0.386304
JMJD2B	null	JMJD2B	jumonji domain containing 2B	0.384925
3110005L21RIK	null	null	null	0.384863
HEXB	null	HEXB	hexosaminidase B (beta polypeptide)	0.384281
RFXDC1	null	RFXDC1	regulatory factor X domain containing 1	0.383331
ALDH3A1	null	ALDH3A1	aldehyde dehydrogenase 3 family, memberA1	0.382691
IQGAP2	null	IQGAP2	IQ motif containing GTPase activating protein 2	0.382241
LACTB2	null	LACTB2	lactamase, beta 2	0.382098
GSTM7	null	null	null	0.382
CORO1A	null	CORO1A	coronin, actin binding protein, 1A	0.381935
GBP4	null	GBP4	guanylate binding protein 4	0.380842
NR3C2	null	NR3C2	nuclear receptor subfamily 3, group C, member 2	0.380624
AKR1C19	null	null	null	0.380493
ANKRD5	null	ANKRD5	ankyrin repeat domain 5	0.380377
NAPSA	null	NAPSA	napsin A aspartic peptidase	0.379626
FAHD1	null	FAHD1	fumarylacetoacetate hydrolase domain containing 1	0.37952
DLGH4	null	null	null	0.379411
NEDD9	null	NEDD9	neural precursor cell expressed, developmentally down-regulated 9	0.379074
NBEAL2	null	NBEAL2	neurobeachin-like 2	0.377146
VEGFC	null	VEGFC	vascular endothelial growth factor C	0.377024
EBF1	null	EBF1	early B-cell factor 1	0.376974
WNT10A	null	WNT10A	wingless-type MMTV integration site family, member 10A	0.376937
PRAMEL3 /// AV320801	null	null	null	0.376899
1110032O16RIK	null	null	null	0.376121
SPA17	null	SPA17	sperm autoantigenic protein 17	0.376047
TRPC1	null	TRPC1	transient receptor potential cation channel, subfamily C, member 1	0.375592
CNNM4	null	CNNM4	cyclin M4	0.375554
1810058N05RIK	null	null	null	0.375355
NCSTN	null	NCSTN	nicastrin	0.375192
ABHD1	null	ABHD1	abhydrolase domain containing 1	0.37517
MICAL1	null	MICAL1	microtubule associated monoxygenase, calponin and LIM domain containing 1	0.375015
OLFML3	null	OLFML3	olfactomedin-like 3	0.374931
LOC677168	null	null	null	0.374757
BCL3	null	BCL3	B-cell CLL/lymphoma 3	0.373252
CBR1	null	CBR1	carbonyl reductase 1	0.373214
TALDO1	null	TALDO1	transaldolase 1	0.37282
3110052M02RIK	null	null	null	0.372105
H2-K1	null	null	null	0.372036
BCAT2	null	BCAT2	branched chain aminotransferase 2, mitochondrial	0.371527
PPP1R3C	null	PPP1R3C	protein phosphatase 1, regulatory (inhibitor) subunit 3C	0.371503
UTP14C	null	UTP14C	UTP14, U3 small nucleolar ribonucleoprotein, homolog C (yeast)	0.370776
D130084N16RIK	null	null	null	0.370554
ACTA2	null	ACTA2	actin, alpha 2, smooth muscle, aorta	0.369906
SCYL2	null	SCYL2	SCY1-like 2 (S. cerevisiae)	0.368496
CDH1	null	CDH1	cadherin 1, type 1, E-cadherin (epithelial)	0.368391
SCYL3	null	SCYL3	SCY1-like 3 (S. cerevisiae)	0.368377
GOLT1A	null	GOLT1A	golgi transport 1 homolog A (S. cerevisiae)	0.36831
SUMF1	null	SUMF1	sulfatase modifying factor 1	0.367913
4930526I15RIK	null	null	null	0.367781
HIST1H2BC	null	HIST1H2BC	histone cluster 1, H2bc	0.367681
EDEM3	null	EDEM3	ER degradation enhancer, mannosidase alpha-like 3	0.367522
ZFP418	null	null	null	0.366632
ARHGAP26	null	ARHGAP26	Rho GTPase activating protein 26	0.366433
PFKP	null	PFKP	phosphofructokinase, platelet	0.366318
A630057N01RIK	null	null	null	0.365676
CTSO	null	CTSO	cathepsin O	0.365239
REM2	null	REM2	RAS (RAD and GEM) like GTP binding 2	0.36399
D11ERTD729E	null	null	null	0.36393
ABCB6	null	ABCB6	ATP-binding cassette, sub-family B (MDR/TAP), member 6	0.36383
A230051G13RIK	null	null	null	0.363673
CCDC51	null	CCDC51	coiled-coil domain containing 51	0.363364
FOSL2 /// LOC634417	null	null	null	0.363044
LARS2	null	LARS2	leucyl-tRNA synthetase 2, mitochondrial	0.36288
ABI3	null	ABI3	ABI gene family, member 3	0.362837
BTG2	null	BTG2	BTG family, member 2	0.362649
TWIST1	null	TWIST1	twist homolog 1 (acrocephalosyndactyly 3; Saethre-Chotzen syndrome) (Drosophila)	0.362382
ERCC5	null	ERCC5	me))	0.361733
TCP11L2	null	TCP11L2	t-complex 11 (mouse) like 2	0.361674
TNFRSF11A	null	TNFRSF11A	tumor necrosis factor receptor superfamily, member 11a, NFKB activator	0.361555
LPHN3	null	LPHN3	latrophilin 3	0.361244
SYT17	null	SYT17	synaptotagmin XVII	0.360534
MARCKS	null	MARCKS	myristoylated alanine-rich protein kinase C substrate	0.360279
PLEKHH1	null	PLEKHH1	pleckstrin homology domain containing, family H (with MyTH4 domain) member 1	0.360131
ZFP238	null	null	null	0.360109
CAMK2N2	null	CAMK2N2	calcium/calmodulin-dependent protein kinase II inhibitor 2	0.359857
4930429M06RIK	null	null	null	0.359848
SORD	null	SORD	sorbitol dehydrogenase	0.359637
ACSS2	null	ACSS2	acyl-CoA synthetase short-chain family member 2	0.35957
F11R	null	F11R	F11 receptor	0.359401
AHR	null	AHR	aryl hydrocarbon receptor	0.359108
C530044C16RIK	null	null	null	0.358647
2017-09-04	null	2017-09-04	septin 4	0.358443
TSGA10	null	TSGA10	testis specific, 10	0.358391
FMN1	null	FMN1	formin 1	0.358005
LOC624295	null	null	null	0.357868
ZSWIM6	null	ZSWIM6	zinc finger, SWIM-type containing 6	0.357816
FDPS	null	FDPS	farnesyl diphosphate synthase (farnesyl pyrophosphate synthetase, dimethylallyltranstransferase, geranyltranstransferase)	0.357218
MATN3	null	MATN3	matrilin 3	0.35706
CMTM6	null	CMTM6	CKLF-like MARVEL transmembrane domain containing 6	0.356894
9130017N09RIK	null	null	null	0.356872
LSM14B	null	LSM14B	LSM14 homolog B (SCD6, S. cerevisiae)	0.356773
PLEKHA6	null	PLEKHA6	pleckstrin homology domain containing, family A member 6	0.356739
D12ERTD647E	null	null	null	0.356718
1700008J07RIK	null	null	null	0.356649
AW049765	null	null	null	0.356593
OLFML2B	null	OLFML2B	olfactomedin-like 2B	0.356577
AW413774	null	null	null	0.356258
CLMN	null	CLMN	calmin (calponin-like, transmembrane)	0.356116
SLCO3A1	null	SLCO3A1	solute carrier organic anion transporter family, member 3A1	0.355974
LOC632764	null	null	null	0.35578
HDAC9	null	HDAC9	histone deacetylase 9	0.355346
A630082K20RIK	null	null	null	0.355155
GUCA1A	null	GUCA1A	guanylate cyclase activator 1A (retina)	0.3549
ENPEP	null	ENPEP	glutamyl aminopeptidase (aminopeptidase A)	0.354887
PFKFB3	null	PFKFB3	6-phosphofructo-2-kinase/fructose-2,6-biphosphatase 3	0.354821
9130409I23RIK	null	null	null	0.354399
CEACAM18	null	CEACAM18	carcinoembryonic antigen-related cell adhesion molecule 18	0.354287
PANX1	null	PANX1	pannexin 1	0.354254
PLXNA2	null	PLXNA2	plexin A2	0.35411
IKBKE	null	IKBKE	inhibitor of kappa light polypeptide gene enhancer in B-cells, kinase epsilon	0.353723
CALD1	null	CALD1	caldesmon 1	0.353519
FN1	null	FN1	fibronectin 1	0.35348
2810013P06RIK	null	null	null	0.352765
SBK1	null	SBK1	SH3-binding domain kinase 1	0.352745
PPP1R1B	null	PPP1R1B	protein phosphatase 1, regulatory (inhibitor) subunit 1B (dopamine and cAMP regulated phosphoprotein, DARPP-32)	0.352675
CCNG2	null	CCNG2	cyclin G2	0.352437
ZFP119	null	null	null	0.35214
MPST	null	MPST	mercaptopyruvate sulfurtransferase	0.352109
CREB5	null	CREB5	cAMP responsive element binding protein 5	0.35206
6620401M08RIK	null	null	null	0.351943
RAB10	null	RAB10	RAB10, member RAS oncogene family	0.351815
2610200G18RIK	null	null	null	0.351695
DIP3B	null	null	null	0.351608
ITPR1	null	ITPR1	inositol 1,4,5-triphosphate receptor, type 1	0.351204
PSCDBP	null	PSCDBP	pleckstrin homology, Sec7 and coiled-coil domains, binding protein	0.351147
SEMA4A	null	SEMA4A	sema domain, immunoglobulin domain (Ig), transmembrane domain (TM) and short cytoplasmic domain, (semaphorin) 4A	0.35069
LONRF3	null	LONRF3	LON peptidase N-terminal domain and ring finger 3	0.350289
SLC25A20	null	SLC25A20	solute carrier family 25 (carnitine/acylcarnitine translocase), member 20	0.349889
LOC195531	null	null	null	0.349844
CCR1	null	CCR1	chemokine (C-C motif) receptor 1	0.349413
GRTP1	null	GRTP1	growth hormone regulated TBC protein 1	0.349042
BC046401	null	null	null	0.348952
A930007B11RIK	null	null	null	0.34832
AI662791	null	null	null	0.348089
CTNNAL1	null	CTNNAL1	catenin (cadherin-associated protein), alpha-like 1	0.347542
NEK1	null	NEK1	NIMA (never in mitosis gene a)-related kinase 1	0.347222
MOGAT2	null	MOGAT2	monoacylglycerol O-acyltransferase 2	0.347155
C430042M11RIK	null	null	null	0.346454
BDNF	null	BDNF	brain-derived neurotrophic factor	0.345907
BC026657	null	null	null	0.345841
BB164513	null	null	null	0.345781
1700049G17RIK	null	null	null	0.345513
HFE	null	HFE	hemochromatosis	0.34534
NBEAL1	null	NBEAL1	neurobeachin-like 1	0.345025
PLK2	null	PLK2	polo-like kinase 2 (Drosophila)	0.344934
LOC629972	null	null	null	0.344525
BC013481	null	null	null	0.344339
D6WSU176E	null	null	null	0.343802
PAX4	null	PAX4	paired box gene 4	0.343498
ENPP3	null	ENPP3	ectonucleotide pyrophosphatase/phosphodiesterase 3	0.342893
C85600	null	null	null	0.342756
CST13	null	null	null	0.341515
BTC	null	BTC	betacellulin	0.341407
2410187C16RIK	null	null	null	0.341152
CYP4V3	null	null	null	0.340941
OSGEPL1	null	OSGEPL1	O-sialoglycoprotein endopeptidase-like 1	0.340214
HCFC1R1	null	HCFC1R1	host cell factor C1 regulator 1 (XPO1 dependent)	0.340088
A930007I19RIK	null	null	null	0.340008
TTC23	null	TTC23	tetratricopeptide repeat domain 23	0.338927
2700038C09RIK	null	null	null	0.338335
ACAD10	null	ACAD10	acyl-Coenzyme A dehydrogenase family, member 10	0.337923
ALCAM	null	ALCAM	activated leukocyte cell adhesion molecule	0.337665
SCD	null	SCD	stearoyl-CoA desaturase (delta-9-desaturase)	0.33761
4931408D14RIK	null	null	null	0.337575
LOC664949 /// LOC671	null	null	null	0.337151
4931419K03RIK	null	null	null	0.336885
GALE	null	GALE	UDP-galactose-4-epimerase	0.336695
YTHDC2	null	YTHDC2	YTH domain containing 2	0.336046
ACVR1B	null	ACVR1B	activin A receptor, type IB	0.335841
SOX13	null	SOX13	SRY (sex determining region Y)-box 13	0.335753
FOXO1A	null	FOXO1A	forkhead box O1A (rhabdomyosarcoma)	0.335545
PYCARD	null	PYCARD	PYD and CARD domain containing	0.33526
DENND2D	null	DENND2D	DENN/MADD domain containing 2D	0.334843
D730035F11RIK	null	null	null	0.334713
1700010I14RIK	null	null	null	0.334436
TMEM80	null	TMEM80	transmembrane protein 80	0.334411
BRSK2	null	BRSK2	BR serine/threonine kinase 2	0.334067
HIGD1A	null	HIGD1A	HIG1 domain family, member 1A	0.333857
1110057K04RIK	null	null	null	0.333742
TEAD1	null	TEAD1	TEA domain family member 1 (SV40 transcriptional enhancer factor)	0.333538
ADCY7	null	ADCY7	adenylate cyclase 7	0.332628
SLC2A2	null	SLC2A2	solute carrier family 2 (facilitated glucose transporter), member 2	0.332603
CNP	null	CNP	2',3'-cyclic nucleotide 3' phosphodiesterase	0.331293
5930433N17RIK	null	null	null	0.33126
HDDC3	null	HDDC3	HD domain containing 3	0.331101
2010109K11RIK	null	null	null	0.331016
PTHR1	null	PTHR1	parathyroid hormone receptor 1	0.330777
NUBPL	null	NUBPL	nucleotide binding protein-like	0.330383
MAGI1	null	MAGI1	membrane associated guanylate kinase, WW and PDZ domain containing 1	0.330161
LOC667118 /// LOC669	null	null	null	0.330047
BC028265	null	null	null	0.32949
CTXN1	null	CTXN1	cortexin 1	0.329283
NCK2	null	NCK2	NCK adaptor protein 2	0.327918
TMEM144	null	TMEM144	transmembrane protein 144	0.32762
DPY19L3	null	DPY19L3	dpy-19-like 3 (C. elegans)	0.327198
NRADD	null	null	null	0.326729
FLRT3	null	FLRT3	fibronectin leucine rich transmembrane protein 3	0.326617
SGTB	null	SGTB	small glutamine-rich tetratricopeptide repeat (TPR)-containing, beta	0.326481
SPEG	null	SPEG	SPEG complex locus	0.325728
NQO2	null	NQO2	NAD(P)H dehydrogenase, quinone 2	0.325717
IFI204 /// LOC672547	null	null	null	0.325711
MAP6	null	MAP6	microtubule-associated protein 6	0.325452
LYSMD3	null	LYSMD3	LysM, putative peptidoglycan-binding, domain containing 3	0.325358
2900011L18RIK	null	null	null	0.325114
PPP2R3A	null	PPP2R3A	protein phosphatase 2 (formerly 2A), regulatory subunit B'', alpha	0.324841
ZFP85-RS1 /// 682041	null	null	null	0.324649
NDRG2	null	NDRG2	NDRG family member 2	0.324647
GAMT	null	GAMT	guanidinoacetate N-methyltransferase	0.323962
TPTE2	null	TPTE2	transmembrane phosphoinositide 3-phosphatase and tensin homolog 2	0.323655
2400002F11RIK	null	null	null	0.323079
NTF5	null	NTF5	neurotrophin 5 (neurotrophin 4/5)	0.322781
IRF7	null	IRF7	interferon regulatory factor 7	0.322659
AP3S2	null	AP3S2	adaptor-related protein complex 3, sigma 2 subunit	0.322398
SVIL	null	SVIL	supervillin	0.322384
TEX11	null	TEX11	testis expressed sequence 11	0.322312
2510042P03RIK	null	null	null	0.321841
ZFP109	null	null	null	0.321784
2310038H17RIK	null	null	null	0.321219
PCDH21	null	PCDH21	protocadherin 21	0.32089
PNRC1	null	PNRC1	proline-rich nuclear receptor coactivator 1	0.31987
B230112P13RIK	null	null	null	0.319635
SLCO2A1	null	SLCO2A1	solute carrier organic anion transporter family, member 2A1	0.319577
RTN4RL1	null	RTN4RL1	reticulon 4 receptor-like 1	0.318873
STARD9 /// LOC668856	null	null	null	0.318065
2610305D13RIK	null	null	null	0.317731
GSTZ1	null	GSTZ1	glutathione transferase zeta 1 (maleylacetoacetate isomerase)	0.317716
1810049H13RIK	null	null	null	0.317369
MYST1	null	MYST1	MYST histone acetyltransferase 1	0.317316
STAT1	null	STAT1	signal transducer and activator of transcription 1, 91kDa	0.317183
M6PRBP1	null	M6PRBP1	mannose-6-phosphate receptor binding protein 1	0.316914
CEP350	null	CEP350	centrosomal protein 350kDa	0.316893
4833420G11RIK	null	null	null	0.316712
MESDC1	null	MESDC1	mesoderm development candidate 1	0.316605
EDIL3	null	EDIL3	EGF-like repeats and discoidin I-like domains 3	0.316555
FCNA	null	null	null	0.31648
TLR2	null	TLR2	toll-like receptor 2	0.316379
RHOC	null	RHOC	ras homolog gene family, member C	0.316354
SPIN2	null	SPIN2	spindlin family, member 2	0.316283
CYP51A1	null	CYP51A1	cytochrome P450, family 51, subfamily A, polypeptide 1	0.316238
AU040320	null	null	null	0.316237
2010300C02RIK /// LO	null	null	null	0.316097
NT5DC1	null	NT5DC1	5'-nucleotidase domain containing 1	0.316076
CSRP2	null	CSRP2	cysteine and glycine-rich protein 2	0.316018
2610110G12RIK	null	null	null	0.31584
4732460K03RIK	null	null	null	0.315683
DIDO1	null	DIDO1	death inducer-obliterator 1	0.315504
ARFGAP3	null	ARFGAP3	ADP-ribosylation factor GTPase activating protein 3	0.315122
BPGM	null	BPGM	2,3-bisphosphoglycerate mutase	0.314975
C030013C21RIK	null	null	null	0.314973
DHX29	null	DHX29	DEAH (Asp-Glu-Ala-His) box polypeptide 29	0.314968
D15WSU126E	null	null	null	0.314936
SOX4 /// LOC672274	null	null	null	0.314604
2610203C22RIK	null	null	null	0.314266
SIRT3	null	SIRT3	sirtuin (silent mating type information regulation 2 homolog) 3 (S. cerevisiae)	0.313996
HS1BP3	null	HS1BP3	HCLS1 binding protein 3	0.313985
DBI	null	DBI	diazepam binding inhibitor (GABA receptor modulator, acyl-Coenzyme A binding protein)	0.31332
TUBB2A /// TUBB2B //	null	null	null	0.312663
CCDC56	null	CCDC56	coiled-coil domain containing 56	0.312477
5430434G16RIK	null	null	null	0.312472
2510006C20RIK	null	null	null	0.31237
ELF3	null	ELF3	E74-like factor 3 (ets domain transcription factor, epithelial-specific )	0.312063
PALM2	null	PALM2	paralemmin 2	0.312047
CHST11	null	CHST11	carbohydrate (chondroitin 4) sulfotransferase 11	0.311656
ANGPT2	null	ANGPT2	angiopoietin 2	0.311305
CRYZ	null	CRYZ	crystallin, zeta (quinone reductase)	0.310878
TUBG2	null	TUBG2	tubulin, gamma 2	0.310867
VANGL2	null	VANGL2	vang-like 2 (van gogh, Drosophila)	0.31083
RDH13	null	RDH13	retinol dehydrogenase 13 (all-trans/9-cis)	0.310823
A930008G19RIK	null	null	null	0.310654
MYO1A /// LOC674795	null	null	null	0.310324
6030458C11RIK	null	null	null	0.309855
CCDC28A	null	CCDC28A	coiled-coil domain containing 28A	0.30957
2900001O04RIK	null	null	null	0.309536
GGPS1	null	GGPS1	geranylgeranyl diphosphate synthase 1	0.309452
BC012278	null	null	null	0.309361
AI314976 /// LOC6728	null	null	null	0.309093
5730559C18RIK	null	null	null	0.309072
LRSAM1	null	LRSAM1	leucine rich repeat and sterile alpha motif containing 1	0.309034
ASTE1	null	ASTE1	asteroid homolog 1 (Drosophila)	0.308998
HDHD3	null	HDHD3	haloacid dehalogenase-like hydrolase domain containing 3	0.308665
RDH11	null	RDH11	retinol dehydrogenase 11 (all-trans/9-cis/11-cis)	0.308496
SCYL1BP1	null	SCYL1BP1	SCY1-like 1 binding protein 1	0.308437
GSTM1 /// LOC433943	null	null	null	0.308353
1500041J02RIK	null	null	null	0.308329
ACSL3	null	ACSL3	acyl-CoA synthetase long-chain family member 3	0.308213
NIPA1	null	NIPA1	non imprinted in Prader-Willi/Angelman syndrome 1	0.307878
4632428N05RIK	null	null	null	0.307703
IL12RB1	null	IL12RB1	interleukin 12 receptor, beta 1	0.307581
TRIM68	null	TRIM68	tripartite motif-containing 68	0.307205
STAT5A	null	STAT5A	signal transducer and activator of transcription 5A	0.306901
HIST1H1E	null	HIST1H1E	histone cluster 1, H1e	0.306813
GM397 /// XM_486399	null	null	null	0.306806
0610031J06RIK	null	null	null	0.306743
6330563C09RIK	null	null	null	0.306721
CTSL	null	CTSL	cathepsin L	0.306624
CD97	null	CD97	CD97 molecule	0.306315
LASS6	null	LASS6	LAG1 homolog, ceramide synthase 6 (S. cerevisiae)	0.306191
BC023892	null	null	null	0.306187
FVT1	null	FVT1	follicular lymphoma variant translocation 1	0.306165
TRPM4	null	TRPM4	transient receptor potential cation channel, subfamily M, member 4	0.305642
FAT4	null	FAT4	FAT tumor suppressor homolog 4 (Drosophila)	0.305623
KCND2	null	KCND2	potassium voltage-gated channel, Shal-related subfamily, member 2	0.305546
RND3	null	RND3	Rho family GTPase 3	0.305333
AU045094	null	null	null	0.304743
MTAP1B	null	null	null	0.304683
SLC41A1	null	SLC41A1	solute carrier family 41, member 1	0.304414
2310076G13RIK	null	null	null	0.304376
KCND1	null	KCND1	potassium voltage-gated channel, Shal-related subfamily, member 1	0.30417
C80154	null	null	null	0.303977
MXD3	null	MXD3	MAX dimerization protein 3	0.303946
4632417D23RIK	null	null	null	0.30375
W91776	null	null	null	0.30371
PTPRB	null	PTPRB	protein tyrosine phosphatase, receptor type, B	0.303575
P4HA2	null	P4HA2	procollagen-proline, 2-oxoglutarate 4-dioxygenase (proline 4-hydroxylase), alpha polypeptide II	0.303542
CXCL11	null	CXCL11	chemokine (C-X-C motif) ligand 11	0.303128
TLN2	null	TLN2	talin 2	0.3031
LOC677213	null	null	null	0.30304
CAMK2N1	null	CAMK2N1	calcium/calmodulin-dependent protein kinase II inhibitor 1	0.302628
ALG8	null	ALG8	asparagine-linked glycosylation 8 homolog (S. cerevisiae, alpha-1,3-glucosyltransferase)	0.301794
ARHGDIB	null	ARHGDIB	Rho GDP dissociation inhibitor (GDI) beta	0.301586
GPR116	null	GPR116	G protein-coupled receptor 116	0.301427
5430435G22RIK	null	null	null	0.301314
STARD10	null	STARD10	START domain containing 10	0.301233
C4B /// LOC675521	null	null	null	0.300981
2810421I24RIK	null	null	null	0.300963
AY026312	null	null	null	0.30072
ST8SIA4	null	ST8SIA4	ST8 alpha-N-acetyl-neuraminide alpha-2,8-sialyltransferase 4	0.300647
GPR23	null	GPR23	G protein-coupled receptor 23	0.300644
A930016P21RIK	null	null	null	0.300553
LY6K	null	LY6K	lymphocyte antigen 6 complex, locus K	0.29994
SERTAD3	null	SERTAD3	SERTA domain containing 3	0.299748
TOB1	null	TOB1	transducer of ERBB2, 1	0.299745
GAS2	null	GAS2	growth arrest-specific 2	0.299573
PTDSS2	null	PTDSS2	phosphatidylserine synthase 2	0.298978
C230085N15RIK	null	null	null	0.2989
TRIM21	null	TRIM21	tripartite motif-containing 21	0.298667
LOX	null	LOX	lysyl oxidase	0.298557
WDR40B	null	WDR40B	WD repeat domain 40B	0.298528
DNPEP	null	DNPEP	aspartyl aminopeptidase	0.298494
RNASET2	null	RNASET2	ribonuclease T2	0.298108
FCGRT	null	FCGRT	Fc fragment of IgG, receptor, transporter, alpha	0.297973
STX6	null	STX6	syntaxin 6	0.297532
4930469P12RIK	null	null	null	0.297487
MRAS	null	MRAS	muscle RAS oncogene homolog	0.297453
GGA2	null	GGA2	golgi associated, gamma adaptin ear containing, ARF binding protein 2	0.297338
GSS	null	GSS	glutathione synthetase	0.297031
1110002L01RIK	null	null	null	0.296985
SDHC	null	SDHC	succinate dehydrogenase complex, subunit C, integral membrane protein, 15kDa	0.296659
PLEKHA4	null	PLEKHA4	pleckstrin homology domain containing, family A (phosphoinositide binding specific) member 4	0.295851
GLUL	null	GLUL	glutamate-ammonia ligase (glutamine synthetase)	0.295568
ADORA2B	null	ADORA2B	adenosine A2b receptor	0.295356
GPR146	null	GPR146	G protein-coupled receptor 146	0.295209
C230078M08RIK	null	null	null	0.294972
BC031441	null	null	null	0.294891
SARDH	null	SARDH	sarcosine dehydrogenase	0.294877
MAP3K13	null	MAP3K13	mitogen-activated protein kinase kinase kinase 13	0.294475
PCMTD2	null	PCMTD2	protein-L-isoaspartate (D-aspartate) O-methyltransferase domain containing 2	0.294434
9130230N09RIK	null	null	null	0.29443
PLA1A	null	PLA1A	phospholipase A1 member A	0.29443
PPCS	null	PPCS	phosphopantothenoylcysteine synthetase	0.294369
NR1H4	null	NR1H4	nuclear receptor subfamily 1, group H, member 4	0.294075
IFT172	null	IFT172	intraflagellar transport 172 homolog (Chlamydomonas)	0.293745
BC038925	null	null	null	0.293688
NALP9C	null	null	null	0.293011
SDSL	null	SDSL	serine dehydratase-like	0.292632
NCF4	null	NCF4	neutrophil cytosolic factor 4, 40kDa	0.292515
CSPP1	null	CSPP1	centrosome and spindle pole associated protein 1	0.292113
2610307O08RIK	null	null	null	0.292041
GAB2	null	GAB2	GRB2-associated binding protein 2	0.291958
2210016F16RIK	null	null	null	0.291957
LRRFIP2	null	LRRFIP2	leucine rich repeat (in FLII) interacting protein 2	0.291878
EXT1	null	EXT1	exostoses (multiple) 1	0.291505
GSTM1	null	GSTM1	glutathione S-transferase M1	0.291474
TULP4 /// 2210038L17	null	null	null	0.291417
MYLK	null	MYLK	myosin, light chain kinase	0.291398
PRRX1	null	PRRX1	paired related homeobox 1	0.29126
RPS6KA1	null	RPS6KA1	ribosomal protein S6 kinase, 90kDa, polypeptide 1	0.291043
1110019D14RIK	null	null	null	0.290864
LOC677248	null	null	null	0.290358
C130051F05RIK	null	null	null	0.290306
WDR35	null	WDR35	WD repeat domain 35	0.290161
2610306M01RIK	null	null	null	0.290122
2700008B19RIK	null	null	null	0.289934
PTPN3	null	PTPN3	protein tyrosine phosphatase, non-receptor type 3	0.289666
YPEL3	null	YPEL3	yippee-like 3 (Drosophila)	0.289493
AI662270	null	null	null	0.288664
C87977	null	null	null	0.288614
2310005N03RIK	null	null	null	0.288299
TOMM40L	null	TOMM40L	translocase of outer mitochondrial membrane 40 homolog-like (yeast)	0.288107
LOC433844	null	null	null	0.288072
LIMS2	null	LIMS2	LIM and senescent cell antigen-like domains 2	0.288026
1110028C15RIK	null	null	null	0.287987
STK38L	null	STK38L	serine/threonine kinase 38 like	0.287908
1700020C11RIK	null	null	null	0.287863
VPS4B	null	VPS4B	vacuolar protein sorting 4 homolog B (S. cerevisiae)	0.28779
3110045G13RIK	null	null	null	0.287731
AMDHD2	null	AMDHD2	amidohydrolase domain containing 2	0.287668
IER5	null	IER5	immediate early response 5	0.28722
FGFR1	null	FGFR1	fibroblast growth factor receptor 1 (fms-related tyrosine kinase 2, Pfeiffer syndrome)	0.28697
1600012H06RIK	null	null	null	0.286928
C530044N13RIK	null	null	null	0.286105
EDNRB	null	EDNRB	endothelin receptor type B	0.285829
RAPGEF5	null	RAPGEF5	Rap guanine nucleotide exchange factor (GEF) 5	0.285458
CASP1	null	CASP1	caspase 1, apoptosis-related cysteine peptidase (interleukin 1, beta, convertase)	0.285335
A130010J15RIK	null	null	null	0.285263
PDE4D	null	PDE4D	phosphodiesterase 4D, cAMP-specific (phosphodiesterase E3 dunce homolog, Drosophila)	0.285004
1110008P14RIK	null	null	null	0.284921
ACY1	null	ACY1	aminoacylase 1	0.284623
LGALS3BP	null	LGALS3BP	lectin, galactoside-binding, soluble, 3 binding protein	0.284448
SERF1A	null	SERF1A	small EDRK-rich factor 1A (telomeric)	0.284448
2310044D20RIK	null	null	null	0.284277
PIP5K3	null	PIP5K3	phosphatidylinositol-3-phosphate/phosphatidylinositol 5-kinase, type III	0.28421
PGF	null	PGF	placental growth factor, vascular endothelial growth factor-related protein	0.283983
MGLL	null	MGLL	monoglyceride lipase	0.283684
LOC553091	null	null	null	0.28347
2610021K21RIK	null	null	null	0.283357
UCKL1	null	UCKL1	uridine-cytidine kinase 1-like 1	0.283296
MAN1A	null	null	null	0.282808
D1BWG0212E	null	null	null	0.282751
KCNAB1	null	KCNAB1	potassium voltage-gated channel, shaker-related subfamily, beta member 1	0.282722
ARF6	null	ARF6	ADP-ribosylation factor 6	0.28241
CD36	null	CD36	CD36 molecule (thrombospondin receptor)	0.2824
GALM	null	GALM	galactose mutarotase (aldose 1-epimerase)	0.282066
LOC545228	null	null	null	0.281815
2610019F03RIK	null	null	null	0.281683
GRB14	null	GRB14	growth factor receptor-bound protein 14	0.281626
TAGLN2 /// LOC672466	null	null	null	0.281388
GCNT1 /// LOC635918	null	null	null	0.281303
BACH1	null	BACH1	BTB and CNC homology 1, basic leucine zipper transcription factor 1	0.281154
GDPD1	null	GDPD1	glycerophosphodiester phosphodiesterase domain containing 1	0.281136
CXADR	null	CXADR	coxsackie virus and adenovirus receptor	0.281046
5830460E08RIK	null	null	null	0.280994
9430034N14RIK	null	null	null	0.280711
SATB2	null	SATB2	SATB family member 2	0.28068
CRI1	null	CRI1	CREBBP/EP300 inhibitor 1	0.280641
SREBF2	null	SREBF2	sterol regulatory element binding transcription factor 2	0.28033
LOC624866	null	null	null	0.28004
JUP	null	JUP	junction plakoglobin	0.280012
1500003O03RIK	null	null	null	0.279964
2310004L02RIK	null	null	null	0.279891
ZNF3	null	ZNF3	zinc finger protein 3	0.279155
NPC2	null	NPC2	Niemann-Pick disease, type C2	0.278626
MTHFR	null	MTHFR	5,10-methylenetetrahydrofolate reductase (NADPH)	0.278555
HIVEP2	null	HIVEP2	human immunodeficiency virus type I enhancer binding protein 2	0.278451
LIPE	null	LIPE	lipase, hormone-sensitive	0.278384
FAAH	null	FAAH	fatty acid amide hydrolase	0.27834
GMPPB	null	GMPPB	GDP-mannose pyrophosphorylase B	0.278312
MGAT5	null	MGAT5	mannosyl (alpha-1,6-)-glycoprotein beta-1,6-N-acetyl-glucosaminyltransferase	0.278137
AI428479	null	null	null	0.278011
TMEM58	null	TMEM58	transmembrane protein 58	0.277807
RHOU	null	RHOU	ras homolog gene family, member U	0.277685
SERPINI1	null	SERPINI1	serpin peptidase inhibitor, clade I (neuroserpin), member 1	0.277638
4833442J19RIK	null	null	null	0.277431
SKAP2	null	SKAP2	src kinase associated phosphoprotein 2	0.277248
IFNA11	null	null	null	0.277227
ITFG3	null	ITFG3	integrin alpha FG-GAP repeat containing 3	0.277083
LOC623781	null	null	null	0.277068
MSR1	null	MSR1	macrophage scavenger receptor 1	0.276996
CHD7	null	CHD7	chromodomain helicase DNA binding protein 7	0.276983
GABBR1	null	GABBR1	gamma-aminobutyric acid (GABA) B receptor, 1	0.276931
SRP54 /// LOC665155	null	null	null	0.276239
6030422H21RIK	null	null	null	0.276157
EFNA4	null	EFNA4	ephrin-A4	0.275766
4930523C07RIK	null	null	null	0.275573
IGSF3	null	IGSF3	immunoglobulin superfamily, member 3	0.275464
NR4A2	null	NR4A2	nuclear receptor subfamily 4, group A, member 2	0.275411
CTSE /// LOC622147 /	null	null	null	0.275145
PRCP	null	PRCP	prolylcarboxypeptidase (angiotensinase C)	0.275056
E330036I19RIK	null	null	null	0.274898
D11ERTD717E	null	null	null	0.274866
AI451606	null	null	null	0.274535
SLC44A1	null	SLC44A1	solute carrier family 44, member 1	0.274484
1810020G14RIK	null	null	null	0.274215
CARD10	null	CARD10	caspase recruitment domain family, member 10	0.274178
BMP2K	null	BMP2K	BMP2 inducible kinase	0.274161
SLC7A11	null	SLC7A11	solute carrier family 7, (cationic amino acid transporter, y+ system) member 11	0.274132
SDCCAG10	null	SDCCAG10	serologically defined colon cancer antigen 10	0.273925
LOC628850 /// LOC628	null	null	null	0.273723
PNKD	null	PNKD	paroxysmal nonkinesiogenic dyskinesia	0.273532
HSPB1	null	HSPB1	heat shock 27kDa protein 1	0.273058
2610020H08RIK	null	null	null	0.272874
1700029I01RIK	null	null	null	0.272806
MAPT	null	MAPT	microtubule-associated protein tau	0.27274
CHES1	null	CHES1	checkpoint suppressor 1	0.272328
5230400G24RIK /// LO	null	null	null	0.272323
2610306H15RIK	null	null	null	0.271765
NME4	null	NME4	non-metastatic cells 4, protein expressed in	0.271361
D230010M03RIK	null	null	null	0.271296
SQLE	null	SQLE	squalene epoxidase	0.2711
D1ERTD564E	null	null	null	0.271063
6330505N24RIK	null	null	null	0.270888
TFF2	null	TFF2	trefoil factor 2 (spasmolytic protein 1)	0.270836
PLLP	null	PLLP	plasma membrane proteolipid (plasmolipin)	0.270619
BC003324	null	null	null	0.270131
FABP4	null	FABP4	fatty acid binding protein 4, adipocyte	0.270053
ZFAND2B	null	ZFAND2B	zinc finger, AN1-type domain 2B	0.269701
RNF19	null	RNF19	ring finger protein 19	0.269692
SNX10	null	SNX10	sorting nexin 10	0.26964
PLD3	null	PLD3	phospholipase D family, member 3	0.269556
TUBB2A	null	TUBB2A	tubulin, beta 2A	0.269386
LPIN1	null	LPIN1	lipin 1	0.269355
6820401H01RIK	null	null	null	0.269243
DHH	null	DHH	desert hedgehog homolog (Drosophila)	0.268804
GCNT2	null	GCNT2	glucosaminyl (N-acetyl) transferase 2, I-branching enzyme (I blood group)	0.26858
A930004K21RIK	null	null	null	0.268454
FRAT2	null	FRAT2	frequently rearranged in advanced T-cell lymphomas 2	0.268402
TRIO	null	TRIO	triple functional domain (PTPRF interacting)	0.26821
MTERF	null	MTERF	mitochondrial transcription termination factor	0.268047
PLOD1	null	PLOD1	procollagen-lysine 1, 2-oxoglutarate 5-dioxygenase 1	0.268016
BC021442	null	null	null	0.267908
TBC1D10C	null	TBC1D10C	TBC1 domain family, member 10C	0.267784
DECR2	null	DECR2	2,4-dienoyl CoA reductase 2, peroxisomal	0.267693
ALDOA /// LOC667483	null	null	null	0.267646
SLC17A2	null	SLC17A2	solute carrier family 17 (sodium phosphate), member 2	0.267621
8430420C20RIK	null	null	null	0.267411
PMAIP1	null	PMAIP1	phorbol-12-myristate-13-acetate-induced protein 1	0.267315
PAK4	null	PAK4	p21(CDKN1A)-activated kinase 4	0.267213
PTPN6	null	PTPN6	protein tyrosine phosphatase, non-receptor type 6	0.267037
KLRA2	null	null	null	0.266873
UBLCP1 /// LOC665689	null	null	null	0.266656
1810046J19RIK	null	null	null	0.266372
CYB561D2	null	CYB561D2	cytochrome b-561 domain containing 2	0.2662
TMEM106A	null	TMEM106A	transmembrane protein 106A	0.266071
D15ERTD30E	null	null	null	0.266049
FMNL2	null	FMNL2	formin-like 2	0.265638
2310005E10RIK	null	null	null	0.265584
ANP32A	null	ANP32A	acidic (leucine-rich) nuclear phosphoprotein 32 family, member A	0.265291
AI848218	null	null	null	0.265124
MGC5739	null	null	null	0.265076
C530014P21RIK	null	null	null	0.264957
ARMC9	null	ARMC9	armadillo repeat containing 9	0.264792
MLYCD	null	MLYCD	malonyl-CoA decarboxylase	0.26414
COL6A2	null	COL6A2	collagen, type VI, alpha 2	0.264109
LOC677429	null	null	null	0.264059
RASL11B	null	RASL11B	RAS-like, family 11, member B	0.264007
SLC22A18	null	SLC22A18	solute carrier family 22 (organic cation transporter), member 18	0.263912
2010111I01RIK	null	null	null	0.263865
ZFP36L1	null	ZFP36L1	zinc finger protein 36, C3H type-like 1	0.263827
4833416E15RIK	null	null	null	0.263792
RHOX5	null	null	null	0.263675
6330407J23RIK	null	null	null	0.263525
PFKFB2	null	PFKFB2	6-phosphofructo-2-kinase/fructose-2,6-biphosphatase 2	0.263436
SOX9	null	SOX9	SRY (sex determining region Y)-box 9 (campomelic dysplasia, autosomal sex-reversal)	0.263302
IDI1	null	IDI1	isopentenyl-diphosphate delta isomerase 1	0.263186
1810030N24RIK	null	null	null	0.263122
ECH1	null	ECH1	enoyl Coenzyme A hydratase 1, peroxisomal	0.263117
PLEKHB2	null	PLEKHB2	pleckstrin homology domain containing, family B (evectins) member 2	0.262925
LOC676974	null	null	null	0.262506
MUTED	null	MUTED	muted homolog (mouse)	0.262194
B230114P17RIK	null	null	null	0.262182
CYP2F2	null	null	null	0.262168
D17ERTD165E	null	null	null	0.262124
RAB3GAP2	null	RAB3GAP2	RAB3 GTPase activating protein subunit 2 (non-catalytic)	0.262089
CSRP1	null	CSRP1	cysteine and glycine-rich protein 1	0.261661
ZNF467	null	ZNF467	zinc finger protein 467	0.261096
MKX	null	MKX	mohawk homeobox	0.260883
BHLHB2	null	BHLHB2	basic helix-loop-helix domain containing, class B, 2	0.260654
DPP7	null	DPP7	dipeptidyl-peptidase 7	0.260653
F5	null	F5	coagulation factor V (proaccelerin, labile factor)	0.260636
IHPK2	null	IHPK2	inositol hexaphosphate kinase 2	0.260527
RIN2	null	RIN2	Ras and Rab interactor 2	0.260178
CHMP1B	null	CHMP1B	chromatin modifying protein 1B	0.260142
EPB4.1L4B	null	null	null	0.26009
MBOAT2	null	MBOAT2	membrane bound O-acyltransferase domain containing 2	0.259849
9930028C20RIK	null	null	null	0.25975
9830147J24RIK	null	null	null	0.25973
YPEL2	null	YPEL2	yippee-like 2 (Drosophila)	0.259666
UGT2B5	null	null	null	0.259666
KLRC1 /// KLRC2	null	null	null	0.259656
ASB1	null	ASB1	ankyrin repeat and SOCS box-containing 1	0.259265
2410005O16RIK	null	null	null	0.259089
SCD5	null	SCD5	stearoyl-CoA desaturase 5	0.25902
4632404H12RIK	null	null	null	0.258987
KITLG	null	KITLG	KIT ligand	0.258874
PEG12	null	null	null	0.258645
NFATC2IP	null	NFATC2IP	nuclear factor of activated T-cells, cytoplasmic, calcineurin-dependent 2 interacting protein	0.258473
GDAP10	null	null	null	0.258108
C77626	null	null	null	0.257988
3110004L20RIK	null	null	null	0.257743
ABCD4	null	ABCD4	ATP-binding cassette, sub-family D (ALD), member 4	0.257582
D530031C13RIK	null	null	null	0.257444
INADL	null	INADL	InaD-like (Drosophila)	0.257186
TRIM2	null	TRIM2	tripartite motif-containing 2	0.257071
PRSS23	null	PRSS23	protease, serine, 23	0.257048
AA536808	null	null	null	0.257004
AI480743	null	null	null	0.2569
4930523O13RIK	null	null	null	0.256869
PPAP2B	null	PPAP2B	phosphatidic acid phosphatase type 2B	0.25661
OSBPL6	null	OSBPL6	oxysterol binding protein-like 6	0.256296
CASP9	null	CASP9	caspase 9, apoptosis-related cysteine peptidase	0.256147
ACN9	null	ACN9	ACN9 homolog (S. cerevisiae)	0.256011
SLC37A3	null	SLC37A3	solute carrier family 37 (glycerol-3-phosphate transporter), member 3	0.255979
XRCC5	null	XRCC5	X-ray repair complementing defective repair in Chinese hamster cells 5 (double-strand-break rejoining; Ku autoantigen, 80kDa)	0.25571
ALDH6A1	null	ALDH6A1	aldehyde dehydrogenase 6 family, member A1	0.255557
CCL27	null	CCL27	chemokine (C-C motif) ligand 27	0.255505
KIF7	null	KIF7	kinesin family member 7	0.254902
TM7SF2	null	TM7SF2	transmembrane 7 superfamily member 2	0.254831
P2RX7	null	P2RX7	purinergic receptor P2X, ligand-gated ion channel, 7	0.254762
TAGLN2	null	TAGLN2	transgelin 2	0.25438
ZHX2	null	ZHX2	zinc fingers and homeoboxes 2	0.254316
GJA4	null	GJA4	gap junction protein, alpha 4, 37kDa (connexin 37)	0.254137
1700019M22RIK	null	null	null	0.25409
ASB7	null	ASB7	ankyrin repeat and SOCS box-containing 7	0.253974
EIF4G3	null	EIF4G3	eukaryotic translation initiation factor 4 gamma, 3	0.253867
4632427E13RIK	null	null	null	0.253377
PLEKHG2	null	PLEKHG2	pleckstrin homology domain containing, family G (with RhoGef domain) member 2	0.25326
NAT6	null	NAT6	N-acetyltransferase 6	0.253236
AKAP13	null	AKAP13	A kinase (PRKA) anchor protein 13	0.25323
EIF4E3	null	EIF4E3	eukaryotic translation initiation factor 4E member 3	0.253197
A530089L17	null	null	null	0.253185
PIK3R1	null	PIK3R1	phosphoinositide-3-kinase, regulatory subunit 1 (p85 alpha)	0.253139
FEM1A	null	FEM1A	fem-1 homolog a (C.elegans)	0.253022
LMNB1	null	LMNB1	lamin B1	0.252937
1300014I06RIK	null	null	null	0.252848
CRIM1	null	CRIM1	cysteine rich transmembrane BMP regulator 1 (chordin-like)	0.252836
2810422O20RIK	null	null	null	0.252718
C730025P13RIK	null	null	null	0.252717
CCDC71	null	CCDC71	coiled-coil domain containing 71	0.252694
AI597479	null	null	null	0.252653
CCBL1	null	CCBL1	cysteine conjugate-beta lyase; cytoplasmic (glutamine transaminase K, kyneurenine aminotransferase)	0.252453
KIF13A	null	KIF13A	kinesin family member 13A	0.252358
AKR1C13	null	null	null	0.252226
V1RD1	null	null	null	0.25221
A730016A17	null	null	null	0.251891
TOM1L1	null	TOM1L1	target of myb1-like 1 (chicken)	0.251557
CHL1	null	CHL1	cell adhesion molecule with homology to L1CAM (close homolog of L1)	0.251184
ALAD	null	ALAD	aminolevulinate, delta-, dehydratase	0.251129
4122401K19RIK	null	null	null	0.250993
USF1	null	USF1	upstream transcription factor 1	0.250973
RAI14	null	RAI14	retinoic acid induced 14	0.250881
RAB4B	null	RAB4B	RAB4B, member RAS oncogene family	0.250603
DNAJC7	null	DNAJC7	DnaJ (Hsp40) homolog, subfamily C, member 7	0.250451
5330401P04RIK	null	null	null	0.250387
HIBCH	null	HIBCH	3-hydroxyisobutyryl-Coenzyme A hydrolase	0.250382
2900078C09RIK	null	null	null	0.250354
MAPK1IP1	null	null	null	0.250344
1700066M21RIK	null	null	null	0.250325
ZBTB8OS	null	ZBTB8OS	zinc finger and BTB domain containing 8 opposite strand	0.25028
NOTCH3	null	NOTCH3	Notch homolog 3 (Drosophila)	0.250221
2810488G03RIK	null	null	null	0.250052
8030451K01RIK	null	null	null	0.24997
4930578N16RIK	null	null	null	0.249867
ORF28	null	null	null	0.249785
CMTM3	null	CMTM3	CKLF-like MARVEL transmembrane domain containing 3	0.249601
2310020J12RIK	null	null	null	0.249513
GLCCI1	null	GLCCI1	glucocorticoid induced transcript 1	0.249509
HBP1	null	HBP1	HMG-box transcription factor 1	0.24944
ESAM1	null	null	null	0.249275
SUOX	null	SUOX	sulfite oxidase	0.249173
GMPPA	null	GMPPA	GDP-mannose pyrophosphorylase A	0.249002
D730039F16RIK	null	null	null	0.248537
FAM59A	null	FAM59A	family with sequence similarity 59, member A	0.248294
6330548G22RIK	null	null	null	0.247733
KIFAP3	null	KIFAP3	kinesin-associated protein 3	0.247595
ZFP518	null	null	null	0.247581
ARL10	null	ARL10	ADP-ribosylation factor-like 10	0.247223
EPB4.2	null	null	null	0.247165
THEM2	null	THEM2	thioesterase superfamily member 2	0.246667
5230400M03RIK	null	null	null	0.246605
2010003H20RIK	null	null	null	0.246439
AU024076	null	null	null	0.246354
ABHD14B	null	ABHD14B	abhydrolase domain containing 14B	0.24633
4930442E04RIK	null	null	null	0.246234
PRRX2	null	PRRX2	paired related homeobox 2	0.246134
1110034G24RIK	null	null	null	0.246063
ZFP51	null	null	null	0.245885
SMURF1	null	SMURF1	SMAD specific E3 ubiquitin protein ligase 1	0.245822
PAM	null	PAM	peptidylglycine alpha-amidating monooxygenase	0.245207
GSTM5	null	GSTM5	glutathione S-transferase M5	0.245189
KLRC3	null	KLRC3	killer cell lectin-like receptor subfamily C, member 3	0.245127
CRIP1	null	CRIP1	cysteine-rich protein 1 (intestinal)	0.2451
ALS2CR4	null	ALS2CR4	amyotrophic lateral sclerosis 2 (juvenile) chromosome region, candidate 4	0.244932
TRPC2	null	TRPC2	transient receptor potential cation channel, subfamily C, member 2	0.244757
BC011487	null	null	null	0.244614
RASEF	null	RASEF	RAS and EF-hand domain containing	0.244223
MAPK11	null	MAPK11	mitogen-activated protein kinase 11	0.244203
C730024G19RIK	null	null	null	0.244091
4833421E05RIK	null	null	null	0.243845
1200016B10RIK	null	null	null	0.243738
CD59A	null	null	null	0.243713
TPP1	null	TPP1	tripeptidyl peptidase I	0.24361
SYNPO	null	SYNPO	synaptopodin	0.243573
RPL30	null	RPL30	ribosomal protein L30	0.24356
MVP	null	MVP	major vault protein	0.243531
TIPARP	null	TIPARP	TCDD-inducible poly(ADP-ribose) polymerase	0.243154
HOXA11OS	null	null	null	0.242941
AQP11	null	AQP11	aquaporin 11	0.24283
A130006I12RIK	null	null	null	0.242238
SHKBP1	null	SHKBP1	SH3KBP1 binding protein 1	0.241705
AU021128	null	null	null	0.241392
UPP1	null	UPP1	uridine phosphorylase 1	0.241029
8030445P17RIK	null	null	null	0.240922
4930538D17RIK	null	null	null	0.240831
TMEM17	null	TMEM17	transmembrane protein 17	0.24078
ARF5	null	ARF5	ADP-ribosylation factor 5	0.240448
4921530L18RIK	null	null	null	0.240414
HRSP12	null	HRSP12	heat-responsive protein 12	0.240378
STX16	null	STX16	syntaxin 16	0.240153
MXRA8	null	MXRA8	matrix-remodelling associated 8	0.240117
5430405H02RIK	null	null	null	0.23981
1700013N18RIK	null	null	null	0.239775
RCOR2	null	RCOR2	REST corepressor 2	0.239077
TMC6	null	TMC6	transmembrane channel-like 6	0.238765
D1ERTD161E	null	null	null	0.238643
DHRS7	null	DHRS7	dehydrogenase/reductase (SDR family) member 7	0.238581
AICDA	null	AICDA	activation-induced cytidine deaminase	0.238556
SIRT5	null	SIRT5	sirtuin (silent mating type information regulation 2 homolog) 5 (S. cerevisiae)	0.238435
DHRS3	null	DHRS3	dehydrogenase/reductase (SDR family) member 3	0.238283
SARS2	null	SARS2	seryl-tRNA synthetase 2	0.238057
ZFP329	null	null	null	0.237851
USP26	null	USP26	ubiquitin specific peptidase 26	0.237757
CAPN5	null	CAPN5	calpain 5	0.237721
1110032A04RIK	null	null	null	0.237607
ATP5E	null	ATP5E	ATP synthase, H+ transporting, mitochondrial F1 complex, epsilon subunit	0.237562
ANKRD47	null	ANKRD47	ankyrin repeat domain 47	0.237461
GTF3C1	null	GTF3C1	general transcription factor IIIC, polypeptide 1, alpha 220kDa	0.237305
MVK	null	MVK	mevalonate kinase (mevalonic aciduria)	0.237244
D530037H12RIK	null	null	null	0.237113
ALS2CR13	null	ALS2CR13	amyotrophic lateral sclerosis 2 (juvenile) chromosome region, candidate 13	0.236822
LYPLA1	null	LYPLA1	lysophospholipase I	0.23681
NIF3L1	null	NIF3L1	NIF3 NGG1 interacting factor 3-like 1 (S. pombe)	0.236764
NIPSNAP3A	null	NIPSNAP3A	nipsnap homolog 3A (C. elegans)	0.236617
D3ERTD343E	null	null	null	0.236534
DARS2	null	DARS2	aspartyl-tRNA synthetase 2 (mitochondrial)	0.236436
TTC15	null	TTC15	tetratricopeptide repeat domain 15	0.235921
AKR1C12	null	null	null	0.235921
ICA1	null	ICA1	islet cell autoantigen 1, 69kDa	0.235847
1810015A11RIK	null	null	null	0.235826
RECQL	null	RECQL	RecQ protein-like (DNA helicase Q1-like)	0.235776
COL27A1	null	COL27A1	collagen, type XXVII, alpha 1	0.235686
SEPW1	null	SEPW1	selenoprotein W, 1	0.235626
AGC1	null	AGC1	aggrecan 1 (chondroitin sulfate proteoglycan 1, large aggregating proteoglycan, antigen identified by monoclonal antibody A0122)	0.23542
NDNL2	null	NDNL2	necdin-like 2	0.235383
MEP1A	null	MEP1A	meprin A, alpha (PABA peptide hydrolase)	0.234849
3110023E09RIK	null	null	null	0.234808
L3MBTL3	null	L3MBTL3	l(3)mbt-like 3 (Drosophila)	0.234464
ACAA2	null	ACAA2	acetyl-Coenzyme A acyltransferase 2 (mitochondrial 3-oxoacyl-Coenzyme A thiolase)	0.234403
NAB2	null	NAB2	NGFI-A binding protein 2 (EGR1 binding protein 2)	0.234317
BC038328	null	null	null	0.23411
TMEM77	null	TMEM77	transmembrane protein 77	0.233925
2210038L17RIK	null	null	null	0.233907
KLC3	null	KLC3	kinesin light chain 3	0.233704
ACTA1	null	ACTA1	actin, alpha 1, skeletal muscle	0.233683
LRRC8D	null	LRRC8D	leucine rich repeat containing 8 family, member D	0.233652
ALDH7A1	null	ALDH7A1	aldehyde dehydrogenase 7 family, member A1	0.233642
ACOT1	null	ACOT1	acyl-CoA thioesterase 1	0.233468
JAM2	null	JAM2	junctional adhesion molecule 2	0.233333
BCL2L12	null	BCL2L12	BCL2-like 12 (proline rich)	0.233303
MULK	null	MULK	multiple substrate lipid kinase	0.233161
ITPK1	null	ITPK1	inositol 1,3,4-triphosphate 5/6 kinase	0.232891
NR1I2	null	NR1I2	nuclear receptor subfamily 1, group I, member 2	0.232888
SEC22C	null	SEC22C	SEC22 vesicle trafficking protein homolog C (S. cerevisiae)	0.23285
STARD4	null	STARD4	START domain containing 4, sterol regulated	0.232778
5430416B10RIK	null	null	null	0.232757
KLHL18	null	KLHL18	kelch-like 18 (Drosophila)	0.232702
E130014J05RIK	null	null	null	0.232604
DDT	null	DDT	D-dopachrome tautomerase	0.232572
PIAS2	null	PIAS2	protein inhibitor of activated STAT, 2	0.23201
PILRA	null	PILRA	paired immunoglobin-like type 2 receptor alpha	0.231808
GORASP1	null	GORASP1	golgi reassembly stacking protein 1, 65kDa	0.23174
DEFB42	null	null	null	0.231575
USP53	null	USP53	ubiquitin specific peptidase 53	0.231456
AGTPBP1 /// LOC67135	null	null	null	0.230929
2610209A20RIK	null	null	null	0.230546
PAK1	null	PAK1	p21/Cdc42/Rac1-activated kinase 1 (STE20 homolog, yeast)	0.230531
PTCH1	null	PTCH1	patched homolog 1 (Drosophila)	0.230481
LYCAT	null	LYCAT	lysocardiolipin acyltransferase	0.230261
KLF3	null	KLF3	Kruppel-like factor 3 (basic)	0.230019
1700007L15RIK	null	null	null	0.229966
1700025K23RIK	null	null	null	0.229897
IFRG15	null	IFRG15	-	0.2298
D8ERTD82E	null	null	null	0.229791
NDUFB3	null	NDUFB3	NADH dehydrogenase (ubiquinone) 1 beta subcomplex, 3, 12kDa	0.229735
2610208E05RIK	null	null	null	0.229535
MS4A4C	null	null	null	0.229533
DLX5	null	DLX5	distal-less homeobox 5	0.229331
AI427138	null	null	null	0.229216
RRAS	null	RRAS	related RAS viral (r-ras) oncogene homolog	0.228672
GPC6	null	GPC6	glypican 6	0.228539
GPR39	null	GPR39	G protein-coupled receptor 39	0.228482
SC4MOL	null	SC4MOL	sterol-C4-methyl oxidase-like	0.228348
ARFGAP1	null	ARFGAP1	ADP-ribosylation factor GTPase activating protein 1	0.228304
SREBF1	null	SREBF1	sterol regulatory element binding transcription factor 1	0.227681
LOC278757 /// LOC631	null	null	null	0.227643
PLD2	null	PLD2	phospholipase D2	0.227623
4930518I15RIK	null	null	null	0.227606
COL5A3	null	COL5A3	collagen, type V, alpha 3	0.227534
PLOD2	null	PLOD2	procollagen-lysine, 2-oxoglutarate 5-dioxygenase 2	0.227454
RNF25	null	RNF25	ring finger protein 25	0.227252
AW060207	null	null	null	0.227202
B230118H07RIK	null	null	null	0.226997
BC003267	null	null	null	0.226971
DHRS8	null	DHRS8	dehydrogenase/reductase (SDR family) member 8	0.226914
MYO1D	null	MYO1D	myosin ID	0.226759
FZD7	null	FZD7	frizzled homolog 7 (Drosophila)	0.226715
MOSC2	null	MOSC2	MOCO sulphurase C-terminal domain containing 2	0.226293
MIR16	null	MIR16	-	0.226017
2010109K09RIK	null	null	null	0.225806
1700041C02RIK	null	null	null	0.225663
PRRG2	null	PRRG2	proline rich Gla (G-carboxyglutamic acid) 2	0.225578
TSPAN17	null	TSPAN17	tetraspanin 17	0.225446
3110001I22RIK	null	null	null	0.225391
TCF8	null	TCF8	transcription factor 8 (represses interleukin 2 expression)	0.225295
1810011O16RIK	null	null	null	0.225194
RPAP1	null	RPAP1	RNA polymerase II associated protein 1	0.225138
1200016E24RIK	null	null	null	0.225104
SOX11	null	SOX11	SRY (sex determining region Y)-box 11	0.225075
AREG	null	AREG	amphiregulin (schwannoma-derived growth factor)	0.225049
INTS6	null	INTS6	integrator complex subunit 6	0.225047
BAIAP2L1	null	BAIAP2L1	BAI1-associated protein 2-like 1	0.225046
GTPBP5	null	GTPBP5	GTP binding protein 5 (putative)	0.225031
FYCO1	null	FYCO1	FYVE and coiled-coil domain containing 1	0.224989
2810021G02RIK	null	null	null	0.224969
AOF1	null	AOF1	amine oxidase (flavin containing) domain 1	0.224545
4921533L14RIK	null	null	null	0.224506
RNF2	null	RNF2	ring finger protein 2	0.224377
LEPROT	null	LEPROT	leptin receptor overlapping transcript	0.22429
BC003331	null	null	null	0.224112
PET112L	null	PET112L	PET112-like (yeast)	0.223858
PPME1	null	PPME1	protein phosphatase methylesterase 1	0.223736
9630026M06RIK	null	null	null	0.22364
9130213B05RIK	null	null	null	0.223524
SEMA3A	null	SEMA3A	sema domain, immunoglobulin domain (Ig), short basic domain, secreted, (semaphorin) 3A	0.223487
PPARG	null	PPARG	peroxisome proliferative activated receptor, gamma	0.223453
GNPTG	null	GNPTG	N-acetylglucosamine-1-phosphate transferase, gamma subunit	0.223442
4921504P05RIK	null	null	null	0.223398
RSAD2	null	RSAD2	radical S-adenosyl methionine domain containing 2	0.223339
SBF2	null	SBF2	SET binding factor 2	0.222986
B020006M18RIK	null	null	null	0.222972
PGM2L1	null	PGM2L1	phosphoglucomutase 2-like 1	0.222959
GIMAP8	null	GIMAP8	GTPase, IMAP family member 8	0.222873
ERBB2IP	null	ERBB2IP	erbb2 interacting protein	0.22276
9430098E02RIK	null	null	null	0.222566
0610010K06RIK	null	null	null	0.222298
D630038D15RIK	null	null	null	0.221961
SPRY3	null	SPRY3	sprouty homolog 3 (Drosophila)	0.221957
ACSL1	null	ACSL1	acyl-CoA synthetase long-chain family member 1	0.221839
BC022687	null	null	null	0.221751
5730509K17RIK	null	null	null	0.221642
HLCS	null	HLCS	holocarboxylase synthetase (biotin-(proprionyl-Coenzyme A-carboxylase (ATP-hydrolysing)) ligase)	0.221467
HIST1H2BP	null	null	null	0.221196
2210008F06RIK	null	null	null	0.221042
SQRDL	null	SQRDL	sulfide quinone reductase-like (yeast)	0.22092
ZFPM1	null	ZFPM1	zinc finger protein, multitype 1	0.220886
2700083E18RIK	null	null	null	0.220883
SCARA3	null	SCARA3	scavenger receptor class A, member 3	0.22087
MARK1	null	MARK1	MAP/microtubule affinity-regulating kinase 1	0.220815
MBOAT5	null	MBOAT5	membrane bound O-acyltransferase domain containing 5	0.220747
C530028I08RIK	null	null	null	0.220641
SLC4A3	null	SLC4A3	solute carrier family 4, anion exchanger, member 3	0.220618
MCOLN2	null	MCOLN2	mucolipin 2	0.220562
RABIF	null	RABIF	RAB interacting factor	0.220152
DDAH2	null	DDAH2	dimethylarginine dimethylaminohydrolase 2	0.219785
BLZF1	null	BLZF1	basic leucine zipper nuclear factor 1 (JEM-1)	0.219708
2300008B03RIK	null	null	null	0.219552
RAB22A	null	RAB22A	RAB22A, member RAS oncogene family	0.219549
1200009F10RIK	null	null	null	0.219534
BCAS1	null	BCAS1	breast carcinoma amplified sequence 1	0.219487
TMEM98	null	TMEM98	transmembrane protein 98	0.21946
HNT	null	HNT	-	0.219375
AP2B1	null	AP2B1	adaptor-related protein complex 2, beta 1 subunit	0.219351
PAOX	null	PAOX	polyamine oxidase (exo-N4-amino)	0.219238
ALS2	null	ALS2	amyotrophic lateral sclerosis 2 (juvenile)	0.219096
8430408G22RIK	null	null	null	0.219049
DGKA	null	DGKA	diacylglycerol kinase, alpha 80kDa	0.218984
TRAPPC6A	null	TRAPPC6A	trafficking protein particle complex 6A	0.218827
APP	null	APP	amyloid beta (A4) precursor protein (peptidase nexin-II, Alzheimer disease)	0.218759
LPIN3	null	LPIN3	lipin 3	0.218755
PILRB	null	PILRB	paired immunoglobin-like type 2 receptor beta	0.218686
SNRPN	null	SNRPN	small nuclear ribonucleoprotein polypeptide N	0.218684
ZFP397	null	null	null	0.218616
BCL9	null	BCL9	B-cell CLL/lymphoma 9	0.218562
MGST3	null	MGST3	microsomal glutathione S-transferase 3	0.21843
TPD52L1	null	TPD52L1	tumor protein D52-like 1	0.21837
AZI2	null	AZI2	5-azacytidine induced 2	0.218366
GTF2H2	null	GTF2H2	general transcription factor IIH, polypeptide 2, 44kDa	0.218308
INSIG2	null	INSIG2	insulin induced gene 2	0.218124
TNFSF11	null	TNFSF11	tumor necrosis factor (ligand) superfamily, member 11	0.217968
LOC14433 /// LOC3806	null	null	null	0.217908
RNASEH1	null	RNASEH1	ribonuclease H1	0.217907
9430080K19RIK	null	null	null	0.217791
IQWD1	null	IQWD1	IQ motif and WD repeats 1	0.217645
6330416G13RIK	null	null	null	0.21747
TRIM7	null	TRIM7	tripartite motif-containing 7	0.216946
ING3	null	ING3	inhibitor of growth family, member 3	0.216869
5730419I09RIK	null	null	null	0.216648
RAB30	null	RAB30	RAB30, member RAS oncogene family	0.21655
DENND4B	null	DENND4B	DENN/MADD domain containing 4B	0.216344
ORMDL1	null	ORMDL1	ORM1-like 1 (S. cerevisiae)	0.215971
MAPKAPK3	null	MAPKAPK3	mitogen-activated protein kinase-activated protein kinase 3	0.215868
ELA1	null	ELA1	elastase 1, pancreatic	0.215806
D430020J02RIK	null	null	null	0.215781
GPATC2	null	GPATC2	G patch domain containing 2	0.215691
KIF3B	null	KIF3B	kinesin family member 3B	0.215681
CDC42EP5	null	CDC42EP5	CDC42 effector protein (Rho GTPase binding) 5	0.215595
TJP3	null	TJP3	tight junction protein 3 (zona occludens 3)	0.215569
VCPIP1	null	VCPIP1	valosin containing protein (p97)/p47 complex interacting protein 1	0.21556
SNAPC1	null	SNAPC1	small nuclear RNA activating complex, polypeptide 1, 43kDa	0.215531
5830408B19RIK	null	null	null	0.215415
4930413O22RIK	null	null	null	0.214798
SPHK2	null	SPHK2	sphingosine kinase 2	0.214672
9930013L23RIK	null	null	null	0.21461
MAP4K3	null	MAP4K3	mitogen-activated protein kinase kinase kinase kinase 3	0.214529
SLC35D2 /// LOC67434	null	null	null	0.214395
1700003F12RIK	null	null	null	0.214296
PPIL3	null	PPIL3	peptidylprolyl isomerase (cyclophilin)-like 3	0.214238
4930404J24RIK	null	null	null	0.214102
ASNSD1	null	ASNSD1	asparagine synthetase domain containing 1	0.21409
BCL2L11	null	BCL2L11	BCL2-like 11 (apoptosis facilitator)	0.214039
PER3	null	PER3	period homolog 3 (Drosophila)	0.213836
SNX11	null	SNX11	sorting nexin 11	0.213739
ZBTB9	null	ZBTB9	zinc finger and BTB domain containing 9	0.213705
MAPRE2	null	MAPRE2	microtubule-associated protein, RP/EB family, member 2	0.21343
LOC77413	null	null	null	0.213272
TUSC4	null	TUSC4	tumor suppressor candidate 4	0.213265
5430439M09RIK	null	null	null	0.213263
1600027N09RIK	null	null	null	0.213156
1110018G07RIK	null	null	null	0.213039
B4GALT1	null	B4GALT1	UDP-Gal:betaGlcNAc beta 1,4- galactosyltransferase, polypeptide 1	0.212878
9430079B08RIK	null	null	null	0.212557
PCYOX1	null	PCYOX1	prenylcysteine oxidase 1	0.212442
BC021608	null	null	null	0.212338
B4GALT3	null	B4GALT3	UDP-Gal:betaGlcNAc beta 1,4- galactosyltransferase, polypeptide 3	0.212282
HYAL2	null	HYAL2	hyaluronoglucosaminidase 2	0.212235
PDZD6	null	PDZD6	PDZ domain containing 6	0.212193
SDC1	null	SDC1	syndecan 1	0.21213
MVD	null	MVD	mevalonate (diphospho) decarboxylase	0.212111
VPS13B /// LOC666173	null	null	null	0.211968
HISPPD1	null	HISPPD1	Histidine acid phosphatase domain containing 1	0.211965
PNKP	null	PNKP	polynucleotide kinase 3'-phosphatase	0.21181
D4WSU114E	null	null	null	0.211735
LOXL2	null	LOXL2	lysyl oxidase-like 2	0.2117
NICN1	null	NICN1	nicolin 1	0.211643
DDX59	null	DDX59	DEAD (Asp-Glu-Ala-Asp) box polypeptide 59	0.211565
ENDOG	null	ENDOG	endonuclease G	0.211561
ATXN3	null	ATXN3	ataxin 3	0.211489
IARS2	null	IARS2	isoleucine-tRNA synthetase 2, mitochondrial	0.211488
A130022J21RIK	null	null	null	0.211397
CDA	null	CDA	cytidine deaminase	0.211211
TAF2	null	TAF2	TAF2 RNA polymerase II, TATA box binding protein (TBP)-associated factor, 150kDa	0.210961
TTC12 /// LOC640389	null	null	null	0.210663
SNRK	null	SNRK	SNF related kinase	0.210474
SYNJ2BP	null	SYNJ2BP	synaptojanin 2 binding protein	0.210448
MASTL	null	MASTL	microtubule associated serine/threonine kinase-like	0.210196
CREM	null	CREM	cAMP responsive element modulator	0.210176
LOC629345	null	null	null	0.210039
5330431K02RIK	null	null	null	0.209708
PIK3R4	null	PIK3R4	phosphoinositide-3-kinase, regulatory subunit 4, p150	0.209473
TMEM14C	null	TMEM14C	transmembrane protein 14C	0.20939
ABTB1	null	ABTB1	ankyrin repeat and BTB (POZ) domain containing 1	0.209327
COG7	null	COG7	component of oligomeric golgi complex 7	0.209283
GOLPH2	null	GOLPH2	golgi phosphoprotein 2	0.209246
PRUNE	null	PRUNE	prune homolog (Drosophila)	0.209212
HIPK2	null	HIPK2	homeodomain interacting protein kinase 2	0.208884
1110007C09RIK	null	null	null	0.208683
FLOT1	null	FLOT1	flotillin 1	0.208653
LOC672274	null	null	null	0.208626
2010011I20RIK	null	null	null	0.208611
YPEL1	null	YPEL1	yippee-like 1 (Drosophila)	0.208511
C1ORF24	null	C1ORF24	chromosome 1 open reading frame 24	0.208397
PON3	null	PON3	paraoxonase 3	0.208352
CYP4F16 /// LOC62374	null	null	null	0.208261
CYCS	null	CYCS	cytochrome c, somatic	0.208242
4930588G05RIK	null	null	null	0.207943
SNRP70	null	SNRP70	small nuclear ribonucleoprotein 70kDa polypeptide (RNP antigen)	0.207932
CLPB	null	CLPB	ClpB caseinolytic peptidase B homolog (E. coli)	0.207925
PELO	null	PELO	pelota homolog (Drosophila)	0.207428
EXOC2	null	EXOC2	exocyst complex component 2	0.207392
C430010C01	null	null	null	0.207114
VILL	null	VILL	villin-like	0.207039
WDR37	null	WDR37	WD repeat domain 37	0.206802
D1ERTD75E	null	null	null	0.206625
RHBDD1	null	RHBDD1	rhomboid domain containing 1	0.206353
BTBD5	null	BTBD5	BTB (POZ) domain containing 5	0.206075
MANSC1	null	MANSC1	MANSC domain containing 1	0.206054
UFC1	null	UFC1	ubiquitin-fold modifier conjugating enzyme 1	0.206037
UNC45A	null	UNC45A	unc-45 homolog A (C. elegans)	0.205824
FARS2	null	FARS2	phenylalanine-tRNA synthetase 2 (mitochondrial)	0.205708
TUG1	null	TUG1	-	0.205681
PEX19	null	PEX19	peroxisomal biogenesis factor 19	0.205444
2310042G06RIK	null	null	null	0.205269
CASP6	null	CASP6	caspase 6, apoptosis-related cysteine peptidase	0.205051
KLF11	null	KLF11	Kruppel-like factor 11	0.204899
AW550831	null	null	null	0.204775
ALDH2	null	ALDH2	aldehyde dehydrogenase 2 family (mitochondrial)	0.204353
HEXA	null	HEXA	hexosaminidase A (alpha polypeptide)	0.204009
SRRM2	null	SRRM2	serine/arginine repetitive matrix 2	0.203766
D19WSU12E	null	null	null	0.203455
1110018J18RIK	null	null	null	0.203274
BC031593	null	null	null	0.203167
AI842396	null	null	null	0.2031
CDKAL1	null	CDKAL1	CDK5 regulatory subunit associated protein 1-like 1	0.203053
ZFP516	null	null	null	0.202899
KCNH3	null	KCNH3	potassium voltage-gated channel, subfamily H (eag-related), member 3	0.202533
IGKV1-135	null	null	null	0.202485
ZHX3	null	ZHX3	zinc fingers and homeoboxes 3	0.202422
QSCN6L1	null	QSCN6L1	quiescin Q6-like 1	0.202391
SLC18A1	null	SLC18A1	solute carrier family 18 (vesicular monoamine), member 1	0.202381
ZFHX1B	null	ZFHX1B	zinc finger homeobox 1b	0.202315
ID2	null	ID2	inhibitor of DNA binding 2, dominant negative helix-loop-helix protein	0.202255
LOC629605	null	null	null	0.202208
MGC30332	null	null	null	0.202138
2900093B09RIK	null	null	null	0.202091
9030617O03RIK	null	null	null	0.202084
ADAMTSL5	null	ADAMTSL5	ADAMTS-like 5	0.201964
2410015B03RIK	null	null	null	0.201927
6330564D18RIK	null	null	null	0.201822
JMJD3	null	JMJD3	jumonji domain containing 3	0.201821
DNAJB14	null	DNAJB14	DnaJ (Hsp40) homolog, subfamily B, member 14	0.201654
SPIRE1	null	SPIRE1	spire homolog 1 (Drosophila)	0.201501
PPIE	null	PPIE	peptidylprolyl isomerase E (cyclophilin E)	0.201338
TMEM63A	null	TMEM63A	transmembrane protein 63A	0.201324
ALDOA	null	ALDOA	aldolase A, fructose-bisphosphate	0.201268
4930429A22RIK	null	null	null	0.200865
GPR137B	null	GPR137B	G protein-coupled receptor 137B	0.200858
9030624J02RIK	null	null	null	0.200841
2410012H22RIK	null	null	null	0.200662
RNF167	null	RNF167	ring finger protein 167	0.200572
ARL5B	null	ARL5B	ADP-ribosylation factor-like 5B	0.2003
QRSL1	null	QRSL1	glutaminyl-tRNA synthase (glutamine-hydrolyzing)-like 1	0.200289
AW549877	null	null	null	0.200287
PTRH1	null	PTRH1	peptidyl-tRNA hydrolase 1 homolog (S. cerevisiae)	0.200222
4921505C17RIK	null	null	null	0.200101
WDSUB1	null	WDSUB1	WD repeat, sterile alpha motif and U-box domain containing 1	0.19978
ADIPOR2	null	ADIPOR2	adiponectin receptor 2	0.19974
0610010E21RIK	null	null	null	0.199724
EEF2K	null	EEF2K	eukaryotic elongation factor-2 kinase	0.19966
ATPBD1B	null	ATPBD1B	ATP binding domain 1 family, member B	0.199584
PDK1	null	PDK1	pyruvate dehydrogenase kinase, isozyme 1	0.199533
CFLAR	null	CFLAR	CASP8 and FADD-like apoptosis regulator	0.199492
LEPREL1	null	LEPREL1	leprecan-like 1	0.199423
PRKAA1	null	PRKAA1	protein kinase, AMP-activated, alpha 1 catalytic subunit	0.199216
MRPL35	null	MRPL35	mitochondrial ribosomal protein L35	0.199139
ZNF306	null	ZNF306	zinc finger protein 306	0.199112
TMEFF2	null	TMEFF2	transmembrane protein with EGF-like and two follistatin-like domains 2	0.199072
BC022224	null	null	null	0.198939
PSMD13	null	PSMD13	proteasome (prosome, macropain) 26S subunit, non-ATPase, 13	0.198562
DCUN1D3	null	DCUN1D3	DCN1, defective in cullin neddylation 1, domain containing 3 (S. cerevisiae)	0.19852
CTF1	null	CTF1	cardiotrophin 1	0.198453
MTSS1	null	MTSS1	metastasis suppressor 1	0.198342
CYB5R1	null	CYB5R1	cytochrome b5 reductase 1	0.198196
2900053A13RIK	null	null	null	0.197982
NR1H2	null	NR1H2	nuclear receptor subfamily 1, group H, member 2	0.197974
HERC2	null	HERC2	hect domain and RLD 2	0.197773
PRKCBP1	null	PRKCBP1	protein kinase C binding protein 1	0.197674
9330133O14RIK	null	null	null	0.197488
A630033E08RIK	null	null	null	0.197411
XPA	null	XPA	xeroderma pigmentosum, complementation group A	0.197339
1810063B07RIK	null	null	null	0.196944
UNC50	null	UNC50	unc-50 homolog (C. elegans)	0.19689
AU020772	null	null	null	0.196748
S100A1	null	S100A1	S100 calcium binding protein A1	0.196594
PGM2	null	PGM2	phosphoglucomutase 2	0.196184
PCOLCE2	null	PCOLCE2	procollagen C-endopeptidase enhancer 2	0.196174
MGAT3	null	MGAT3	mannosyl (beta-1,4-)-glycoprotein beta-1,4-N-acetylglucosaminyltransferase	0.196037
AI662250	null	null	null	0.196001
ADD3	null	ADD3	adducin 3 (gamma)	0.19577
IL11RA1 /// IL11RA2	null	null	null	0.195743
ZFP353	null	null	null	0.195732
USP19	null	USP19	ubiquitin specific peptidase 19	0.195261
OPLAH	null	OPLAH	5-oxoprolinase (ATP-hydrolysing)	0.195231
D9ERTD292E	null	null	null	0.195152
4733401H18RIK	null	null	null	0.195001
MAP4K3 /// LOC675560	null	null	null	0.194769
9130229H14RIK	null	null	null	0.194752
RALGPS2	null	RALGPS2	Ral GEF with PH domain and SH3 binding motif 2	0.194213
DNAJB10	null	null	null	0.194144
PTK2B	null	PTK2B	PTK2B protein tyrosine kinase 2 beta	0.19408
D630039A03RIK	null	null	null	0.194039
UBLCP1	null	UBLCP1	ubiquitin-like domain containing CTD phosphatase 1	0.193976
2500002B13RIK	null	null	null	0.193934
RGS12	null	RGS12	regulator of G-protein signalling 12	0.193925
3230401I01RIK	null	null	null	0.19383
A430093A21RIK	null	null	null	0.193829
EDARADD	null	EDARADD	EDAR-associated death domain	0.193747
IVL	null	IVL	involucrin	0.193707
DST	null	DST	dystonin	0.193516
USP4	null	USP4	ubiquitin specific peptidase 4 (proto-oncogene)	0.193455
AU041474	null	null	null	0.193411
GM561	null	null	null	0.193108
ZFP719	null	null	null	0.19275
RPP21	null	RPP21	ribonuclease P 21kDa subunit	0.192668
MRPS14	null	MRPS14	mitochondrial ribosomal protein S14	0.192638
ELOVL6	null	ELOVL6	ELOVL family member 6, elongation of long chain fatty acids (FEN1/Elo2, SUR4/Elo3-like, yeast)	0.192603
9630037P07RIK	null	null	null	0.192499
MLH1	null	MLH1	mutL homolog 1, colon cancer, nonpolyposis type 2 (E. coli)	0.192428
D5BUC30E	null	null	null	0.19225
ZFYVE26	null	ZFYVE26	zinc finger, FYVE domain containing 26	0.19219
SLC2A1	null	SLC2A1	solute carrier family 2 (facilitated glucose transporter), member 1	0.19218
E030003F13RIK	null	null	null	0.192156
SLC25A16	null	SLC25A16	solute carrier family 25 (mitochondrial carrier; Graves disease autoantigen), member 16	0.19213
2610009E16RIK	null	null	null	0.192032
KCTD3	null	KCTD3	potassium channel tetramerisation domain containing 3	0.191896
RNF141	null	RNF141	ring finger protein 141	0.191826
BAG2	null	BAG2	BCL2-associated athanogene 2	0.191793
RIC8A	null	RIC8A	resistance to inhibitors of cholinesterase 8 homolog A (C. elegans)	0.191748
ALAS1	null	ALAS1	aminolevulinate, delta-, synthase 1	0.191673
RNF44	null	RNF44	ring finger protein 44	0.191546
PPP1R7	null	PPP1R7	protein phosphatase 1, regulatory subunit 7	0.19153
ECE1	null	ECE1	endothelin converting enzyme 1	0.191389
KIFC3	null	KIFC3	kinesin family member C3	0.191379
AU022870	null	null	null	0.191282
CLK1	null	CLK1	CDC-like kinase 1	0.191244
A930012M21RIK	null	null	null	0.191097
ZFP688	null	null	null	0.191064
4631427C17RIK	null	null	null	0.190646
2810410D24RIK	null	null	null	0.190626
ACAA1A /// ACAA1B	null	null	null	0.190566
HTRA1	null	HTRA1	HtrA serine peptidase 1	0.190469
ZMYM6	null	ZMYM6	zinc finger, MYM-type 6	0.190434
LOC552906	null	null	null	0.190016
RELB	null	RELB	v-rel reticuloendotheliosis viral oncogene homolog B, nuclear factor of kappa light polypeptide gene enhancer in B-cells 3 (avian)	0.189977
IFNGR2	null	IFNGR2	interferon gamma receptor 2 (interferon gamma transducer 1)	0.189923
MOXD1	null	MOXD1	monooxygenase, DBH-like 1	0.189887
TBC1D7	null	TBC1D7	TBC1 domain family, member 7	0.18954
PIGB	null	PIGB	phosphatidylinositol glycan anchor biosynthesis, class B	0.189393
TEAD2	null	TEAD2	TEA domain family member 2	0.189194
RSL1	null	null	null	0.189117
4833439L19RIK	null	null	null	0.189097
CCDC101	null	CCDC101	coiled-coil domain containing 101	0.188883
SMURF1 /// LOC640390	null	null	null	0.188793
IL6R	null	IL6R	interleukin 6 receptor	0.188698
6430570G24	null	null	null	0.18859
6430598H11RIK	null	null	null	0.188523
ACRBP	null	ACRBP	acrosin binding protein	0.18836
TGFB3	null	TGFB3	transforming growth factor, beta 3	0.188131
GPBP1L1	null	GPBP1L1	GC-rich promoter binding protein 1-like 1	0.18813
SPTY2D1	null	SPTY2D1	SPT2, Suppressor of Ty, domain containing 1 (S. cerevisiae)	0.188128
KRT1-10	null	null	null	0.18804
TREX1	null	TREX1	three prime repair exonuclease 1	0.187827
9530068E07RIK	null	null	null	0.187765
ST5	null	ST5	suppression of tumorigenicity 5	0.187726
PAPOLG	null	PAPOLG	poly(A) polymerase gamma	0.187725
CCDC12	null	CCDC12	coiled-coil domain containing 12	0.1877
3110073H01RIK	null	null	null	0.187662
ATP2B1	null	ATP2B1	ATPase, Ca++ transporting, plasma membrane 1	0.18765
AI450236	null	null	null	0.187523
ACOT2	null	ACOT2	acyl-CoA thioesterase 2	0.187459
UCK2	null	UCK2	uridine-cytidine kinase 2	0.187407
AOX1	null	AOX1	aldehyde oxidase 1	0.187345
IGSF8	null	IGSF8	immunoglobulin superfamily, member 8	0.187343
MOD1 /// LOC624892 /	null	null	null	0.18706
CAT	null	CAT	catalase	0.187011
HDAC4	null	HDAC4	histone deacetylase 4	0.187004
JARID1A	null	JARID1A	jumonji, AT rich interactive domain 1A	0.186819
VPS41	null	VPS41	vacuolar protein sorting 41 (yeast)	0.186532
CTR9	null	CTR9	Ctr9, Paf1/RNA polymerase II complex component, homolog (S. cerevisiae)	0.186485
MAPKAP1	null	MAPKAP1	mitogen-activated protein kinase associated protein 1	0.186458
SMARCAL1	null	SMARCAL1	SWI/SNF related, matrix associated, actin dependent regulator of chromatin, subfamily a-like 1	0.186407
GSDMDC1	null	GSDMDC1	gasdermin domain containing 1	0.186402
CHEK2	null	CHEK2	CHK2 checkpoint homolog (S. pombe)	0.186371
CACNB3	null	CACNB3	calcium channel, voltage-dependent, beta 3 subunit	0.186332
4930418G15RIK	null	null	null	0.186184
MYLPF	null	MYLPF	-	0.186051
GLRX2	null	GLRX2	glutaredoxin 2	0.186002
A930037O16RIK	null	null	null	0.185893
ZFP94	null	null	null	0.185738
2310003C23RIK	null	null	null	0.18553
ZFP54	null	null	null	0.185523
DNAJB5	null	DNAJB5	DnaJ (Hsp40) homolog, subfamily B, member 5	0.185482
4930455F23RIK	null	null	null	0.185464
SLC25A27	null	SLC25A27	solute carrier family 25, member 27	0.185351
KLF10	null	KLF10	Kruppel-like factor 10	0.185333
LOC675366	null	null	null	0.185222
PPT1	null	PPT1	palmitoyl-protein thioesterase 1 (ceroid-lipofuscinosis, neuronal 1, infantile)	0.185218
2700049A03RIK	null	null	null	0.185114
TMEM131	null	TMEM131	transmembrane protein 131	0.185038
NFKBIA	null	NFKBIA	nuclear factor of kappa light polypeptide gene enhancer in B-cells inhibitor, alpha	0.185006
AA522020	null	null	null	0.184997
GYS1	null	GYS1	glycogen synthase 1 (muscle)	0.184968
NGRN	null	NGRN	neugrin, neurite outgrowth associated	0.184912
PPP2R5B	null	PPP2R5B	protein phosphatase 2, regulatory subunit B (B56), beta isoform	0.184885
BC059842	null	null	null	0.184745
PPM1M	null	PPM1M	protein phosphatase 1M (PP2C domain containing)	0.184743
RETSAT	null	RETSAT	retinol saturase (all-trans-retinol 13,14-reductase)	0.184562
TRIP12	null	TRIP12	thyroid hormone receptor interactor 12	0.184465
GALK2	null	GALK2	galactokinase 2	0.184398
D17H6S56E-5	null	null	null	0.184199
POT1	null	POT1	POT1 protection of telomeres 1 homolog (S. pombe)	0.184111
C230095G01RIK	null	null	null	0.183989
2700094F01RIK	null	null	null	0.18398
CLCA6 /// AI747448	null	null	null	0.183882
PEX11A	null	PEX11A	peroxisomal biogenesis factor 11A	0.183869
COG6	null	COG6	component of oligomeric golgi complex 6	0.18384
PLSCR3	null	PLSCR3	phospholipid scramblase 3	0.183685
HTRA3	null	HTRA3	HtrA serine peptidase 3	0.183428
MMAB	null	MMAB	methylmalonic aciduria (cobalamin deficiency) cblB type	0.183302
NDUFS1	null	NDUFS1	NADH dehydrogenase (ubiquinone) Fe-S protein 1, 75kDa (NADH-coenzyme Q reductase)	0.183285
CDC42EP1	null	CDC42EP1	CDC42 effector protein (Rho GTPase binding) 1	0.183283
FBXW17	null	null	null	0.183219
KLHL20	null	KLHL20	kelch-like 20 (Drosophila)	0.183159
RRM2B	null	RRM2B	ribonucleotide reductase M2 B (TP53 inducible)	0.182925
TMCO1	null	TMCO1	transmembrane and coiled-coil domains 1	0.182862
AI315068	null	null	null	0.182765
PAQR8	null	PAQR8	progestin and adipoQ receptor family member VIII	0.182695
V1RC4	null	null	null	0.182557
CLCN6	null	CLCN6	chloride channel 6	0.182535
POFUT1	null	POFUT1	protein O-fucosyltransferase 1	0.182503
PIGH	null	PIGH	phosphatidylinositol glycan anchor biosynthesis, class H	0.182472
BOLA1	null	BOLA1	bolA homolog 1 (E. coli)	0.182429
EFNA5	null	EFNA5	ephrin-A5	0.182396
2700079J08RIK	null	null	null	0.182215
ALDH9A1	null	ALDH9A1	aldehyde dehydrogenase 9 family, member A1	0.182177
MGC52110	null	MGC52110	-	0.182128
ARHGEF4	null	ARHGEF4	Rho guanine nucleotide exchange factor (GEF) 4	0.182122
SPRY4	null	SPRY4	sprouty homolog 4 (Drosophila)	0.182071
CAMSAP1L1	null	CAMSAP1L1	calmodulin regulated spectrin-associated protein 1-like 1	0.181957
4933407H18RIK	null	null	null	0.181852
ETV6	null	ETV6	ets variant gene 6 (TEL oncogene)	0.181834
2310035K24RIK	null	null	null	0.181646
RBMS2	null	RBMS2	RNA binding motif, single stranded interacting protein 2	0.181596
ZNF8	null	ZNF8	zinc finger protein 8	0.18159
1200014M14RIK	null	null	null	0.181556
BCS1L	null	BCS1L	BCS1-like (yeast)	0.181495
LOC433230	null	null	null	0.181426
NSUN3	null	NSUN3	NOL1/NOP2/Sun domain family, member 3	0.181412
RBM35B	null	RBM35B	RNA binding motif protein 35B	0.181354
CARD6	null	CARD6	caspase recruitment domain family, member 6	0.181298
B230339M05RIK	null	null	null	0.181275
MRPL36	null	MRPL36	mitochondrial ribosomal protein L36	0.181228
UROS	null	UROS	uroporphyrinogen III synthase (congenital erythropoietic porphyria)	0.181086
KLF7	null	KLF7	Kruppel-like factor 7 (ubiquitous)	0.181013
LRRFIP1	null	LRRFIP1	leucine rich repeat (in FLII) interacting protein 1	0.180803
UBE2F	null	UBE2F	ubiquitin-conjugating enzyme E2F (putative)	0.180552
1700025G04RIK	null	null	null	0.180348
SEH1L	null	SEH1L	SEH1-like (S. cerevisiae)	0.180309
CHD2	null	CHD2	chromodomain helicase DNA binding protein 2	0.17994
FOLR1	null	FOLR1	folate receptor 1 (adult)	0.179645
[truncated: 7,393 more rows]
