# Supplementary material for: CD38-Mediated Immunosuppression as a Mechanism of Tumor Cell Escape from PD-1/PD-L1 Blockade
Source: Oxford University Press journal article supplement (doi:10.1158/2159-8290.cd-17-1033), 2018-07-16
Supplement: 21598290cd171033-sup-189304_3_supp_4848984_p22gh9.xlsx [file 21598290cd171033-sup-189304_3_supp_4848984_p22gh9.xlsx]

## Sheet: TMA3
Supplementary Table S7. Patient sample information as well as CD38 and PD-L1 IHC score in lung cancer tissue microarray bank TMA3.
TMA-3 Block ID	TMA Block #	Cores	% PD-L1 positive tumor cells (membranous)	CD38 average final H-score tumor cells (membranous)	CD38 average final H-score tumor cells (cytoplasmic)
G7	TMA 367	A1-A3	18.5682
E8	TMA 367	A4-A6	82.207	0	0
C5	TMA 367	A7-A9	14.407	0	2.5
A5	TMA 367	A10-A12	16.2565	0	0
B11	TMA 367	B1-B3	56.3133	0	8.5
D7	TMA 367	B4-B6	8.3107	0	0
B3	TMA 367	B7-B9	19.563	0	0
A9	TMA 367	B10-B12	9.63767	0.666667	8.33333
G7	TMA 367	C1-C3	52.6639	0	0
F6	TMA 367	C4-C6	10.6888	0	0
B7	TMA 367	C7-C9	3.96413	0	0
I7	TMA 367	C10-C12	9.21517	1.66667	3.33333
F7	TMA 367	D1-D3	17.3647	0	0
F6	TMA 367	D4-D6	53.1615	0	2.5
H7	TMA 367	D7-D9	22.1583	67.5	42.5
C6	TMA 367	D10-D12	9.34957	108.333	110
E6	TMA 367	E1-E3	15.383	0	3.33333
D12	TMA 367	E4-E6	2.0145	0	8
D7	TMA 367	E7-E9	4.79863	0	1.66667
E11	TMA 367	E10-E12	91.6505
C5	TMA 367	F1-F3	17.0593	0	0
F8	TMA 367	F4-F6	38.1339	0	0
H10	TMA 367	F7-F9	2.85697	0	0
D9	TMA 367	F10-F12	94.6777	36.6667	43.3333
E9	TMA 367	G1-G3	34.5385	0	0
C8	TMA 367	G4-G6	67.0238	0	0
E4	TMA 367	G7-G9	12.8989	0	5
C8	TMA 367	G10-G12	11.6878	0	0
B2	TMA 367	H1-H3	10.2182	0	10
E3	TMA 367	H4-H6	17.0885	0	0
E6	TMA 368	A1-A3	11.8613	0	0
C9	TMA 368	A4-A6	11.3517	0	0
I6	TMA 368	A7-A9	7.53635	0	0
C10	TMA 368	A10-A12	93.119	0	0
A5	TMA 368	B1-B3	4.88455	0	0
A10	TMA 368	B4-B6	13.851	0	0
F9	TMA 368	B7-B9	82.76
B7	TMA 368	B10-B12	21.0737	0	0
A2	TMA 368	C1-C3	54.9338	35	60
D8	TMA 368	C4-C6	44.9823	7.5	2.5
E4	TMA 368	C7-C9	54.0081	0	0
B4	TMA 368	C10-C12	30.1453	0	0
B10	TMA 368	D1-D3	95.7657	0	0
E4	TMA 368	D4-D6	14.8055	0	0
I8	TMA 368	D7-D9
E5	TMA 368	D10-D12	57.8405	0	0
O7	TMA 368	E1-E3	62.0425	0	0
B8	TMA 368	E4-E6	99.158	0	0
F5	TMA 368	E7-E9	94.3354	0	0
C3 ,C9	TMA 368	E10-E12	94.965	0	0
A1	TMA 368	F1-F3	98.02
D8	TMA 368	F4-F6	94.66	0	73.3333
N16	TMA 368	F7-F9	24.28	0	0
B4	TMA 368	F10-F12
C8	TMA 368	G1-G3	83.4227
B7	TMA 368	G4-G6	26.115	5	20
G8	TMA 368	G7-G9	3.74324	0	0
D4	TMA 368	G10-G12	96.389	0	0
F8	TMA 368	H1-H3	43.9784	0	0
C9	TMA 368	H4-H6	27.66
D9	TMA-369	A1-A3	22.3439	0	0
A20	TMA-369	A4-A6	97.8645	0	0
J11	TMA-369	A7-A9	18.3221	0	0
E17	TMA-369	A10-A12	42.8411	0	0
C2	TMA-369	B1-B3	35.3319	0	1.66667
D9	TMA-369	B4-B6	98.7555	0	0
E13	TMA-369	B7-B9	9.61176	0	0
A6	TMA-369	B10-B12		0	0
D6	TMA-369	C1-C3	18.5261	0	0
C7	TMA-369	C4-C6	92.2857	0	15
D5	TMA-369	C7-C9	58.9225	0	0
D7	TMA-369	C10-C12	36.4802	0	2.5
E11	TMA-369	D1-D3	51.5271	0	0
H11	TMA-369	D4-D6	38.9533	3.33333	20
E6	TMA-369	D7-D9	69.8543	0	0
E11	TMA-369	D10-D12	60.4156	36.6667	16.6667
D5	TMA-369	E1-E3	85.77	0	0
E2	TMA-369	E4-E6	7.58129	0	0
E7	TMA-369	E7-E9	3.6393	0	0
G10	TMA-369	E10-E12	6.62603	0	0
B6	TMA-369	F1-F3	60.8117	0	0
A1	TMA-369	F4-F6	39.0227	10	0
C14	TMA-369	F7-F9	9.34307	0	0
D6,D5	TMA-369	F10-F12	22.7172	0	0
G6	TMA-369	G1-G3	5.95721	0	2.5
N8	TMA-369	G4-G6	24.8831	0	0
G9	TMA-369	G7-G9
B4	TMA-369	G10-G12		0	0
F5,F7	TMA-369	H1-H3
E11,E10	TMA-369	H4-H6	16.496	210	160
D5	TMA-370	A1-A3	14.5299	0	0
B11	TMA-370	A4-A6	35.0912	0	5
E14	TMA-370	A7-A9	7.55106	0	0
D5	TMA-370	A10-A12	2.9515	0	0
I9	TMA-370	B1-B3	86.9684	0	5
I5	TMA-370	B4-B6	8.39
D9	TMA-370	B7-B9	6.54848	0	0
B4	TMA-370	B10-B12	10.6017
E4	TMA-370	C1-C3	88.0671	25	25
C2	TMA-370	C4-C6
F10	TMA-370	C7-C9	16.7734	0	0
L13	TMA-370	C10-C12	3.0636	0	0
C4	TMA-370	D1-D3	16.048	0	0
E6	TMA-370	D4-D6	17.1553	0	0
J12	TMA-370	D7-D9	95.6957	0	0
L5,L3	TMA-370	D10-D12	6.58533	0	0
F8	TMA-370	E1-E3
F3,F6	TMA-370	E4-E6
F7	TMA-370	E7-E9
E7	TMA-370	E10-E12	1.4259	0	0
F3	TMA-370	F1-F3	15.3759	0	0
D6	TMA-370	F4-F6
F8	TMA-370	F7-F9
C5	TMA-370	F10-F12	5.65193	0	0
B8	TMA-370	G1-G3	19.7222	0	0
E14	TMA-370	G4-G6	29.5818	0	0
G4	TMA-370	G7-G9
B6	TMA-370	G10-G12	98.6238	0	6.66667
C6	TMA-370	H1-H3	2.0899	0	0
G4	TMA-370	H4-H6	11.5852	0	0
D3	TMA-371	A1-A3	34.911	0	0
G10	TMA-371	A4-A6	16.2641	0	0
D7,D5	TMA-371	A7-A9	11.0288	10	10
A5,A7	TMA-371	A10-A12	17.5082	0	0
F6	TMA-371	B1-B3	39.7043	0	0
C11	TMA-371	B4-B6	48.467	0	0
G12	TMA-371	B7-B9	19.4145	0	0
D2	TMA-371	B10-B12	95.541	0	7.5
D9	TMA-371	C1-C3	19.0294	0	0
C6	TMA-371	C4-C6	62.9232	0	0
C7	TMA-371	C7-C9
D5	TMA-371	C10-C12
F9	TMA-371	D1-D3	25.373	0	0
F9,F8	TMA-371	D4-D6	86.7712	0	0
A9	TMA-371	D7-D9	79.8787
F5	TMA-371	D10-D12	21.9682	0	0
F3	TMA-371	E1-E3	29.0962	35	100
E5,E3	TMA-371	E4-E6	83.332
E6	TMA-371	E7-E9	88.728
A8,A11	TMA-371	E10-E12	6.5349	0	0
G9	TMA-371	F1-F3	96.6494	0	0
L6	TMA-371	F4-F6	10.1229	0	0
C11	TMA-371	F7-F9	73.3203	0	0
D14	TMA-371	F10-F12	12.695	0	0
G7	TMA-371	G1-G3	47.7565	0	3.33333
F7	TMA-371	G4-G6	19.9395	0	0
E5	TMA-371	G7-G9	15.4182	0	0
I6	TMA-371	G10-G12
F3	TMA-371	H1-H3	13.621	25	10
C2	TMA-371	H4-H6	5.8578
I6	TMA-372	A1-A3	56.061	0	0
C8	TMA-372	A4-A6	7.2568	0	0
B11	TMA-372	A7-A9	84.92
H4	TMA-372	A10-A12	39.4977	0	0
G10	TMA-372	B1-B3	38.1344	0	0
M5	TMA-372	B4-B6	16.8895	0	0
C7	TMA-372	B7-B9	51.2447	0	0
D2	TMA-372	B10-B12	36.7045	0	0
E11	TMA-372	C1-C3	36.2954	17.5	17.5
C8	TMA-372	C4-C6	18.4958	0	0
C7,C9	TMA-372	C7-C9
G1	TMA-372	C10-C12
E9	TMA-372	D1-D3	87.98
H7	TMA-372	D4-D6
C10	TMA-372	D7-D9	28.342	0	0
G9	TMA-372	D10-D12	26.2379	55	30
F13	TMA-372	E1-E3
A3	TMA-372	E4-E6	95.3035	0	0
G14	TMA-372	E7-E9	21.1525	0	0
F1	TMA-372	E10-E12
F16	TMA-372	F1-F3	97.7445	0	60
E3	TMA-372	F4-F6
H4	TMA-372	F7-F9	17.8328	2.5	2.5
E2	TMA-372	F10-F12	7.04182	0	0
M23	TMA-372	G1-G3	24.4891	0	0
K7	TMA-372	G4-G6	89.7
C6	TMA-372	G7-G9
B11	TMA-372	G10-G12	34.963	0	0
B3	TMA-372	H1-H3
F5	TMA-372	H4-H6	80.1095	0	0
B7	TMA-373	A1-A3
F2	TMA-373	A4-A6	35.0506	0	0
D6,D5	TMA-373	A7-A9	61.5901	5	5
C5	TMA-373	A10-A12
A5	TMA-373	B1-B3	20.2821	0	0
A2	TMA-373	B4-B6
B3,B5	TMA-373	B7-B9
E8	TMA-373	B10-B12	48.765	0	0
H7,H10	TMA-373	C1-C3	7.82317	61.6667	50
I6	TMA-373	C4-C6	91.2168	0	0
F6,F5	TMA-373	C7-C9		0	0
H9	TMA-373	C10-C12	98.9638	0	0
2	TMA-373	D1-D3	81.1764	0	0
G8	TMA-373	D4-D6	92.5757	0	20
D14	TMA-373	D7-D9	7.6145	0	0
D3	TMA-373	D10-D12	97.5205	0	0
E6	TMA-373	E1-E3	18.0253	0	0
E8	TMA-373	E4-E6		0	0
D6	TMA-373	E7-E9	72.2933	0	0
C8	TMA-373	E10-E12	33.7525	0	0
I2-I8	TMA-373	F1-F3	7.77289	0	0
C12	TMA-373	F4-F6	73.4775	95	77.5
E9	TMA-373	F7-F9	96.5368	0	0
D5	TMA-373	F10-F12	32.032	0	0
E4	TMA-373	G1-G3		0	0
J6	TMA-374	A1-A3	66.5304	0	0
C4	TMA-374	A4-A6	23.046	0	0
F5	TMA-374	A7-A9	46.3839	0	0
C4	TMA-374	A10-A12		0	0
B6	TMA-374	B1-B3	24.4528
J3	TMA-374	B4-B6	94.9669	0	0
G7	TMA-374	B7-B9	39.0392	0	0
G6	TMA-374	B10-B12		0	0
E7	TMA-374	C1-C3	17.522	0	0
E6	TMA-374	C4-C6	68.4227	0	0
C8	TMA-374	C7-C9	53.0405
N6	TMA-374	C10-C12	26.3316	0	0
E5	TMA-374	D1-D3	22.5488	0	0
E9	TMA-374	D4-D6	96.3765	0	0
O10	TMA-374	D7-D9	85.6117	0	0
O4	TMA-374	D10-D12	6.6366
E5	TMA-374	E1-E3	27.2346	0	0
G6	TMA-374	E4-E6	16.3404	0	0
F9	TMA-374	E7-E9	10.9285	5	10
E10	TMA-374	E10-E12	78.3633	0	0
F8	TMA-374	F1-F3	5.4998	15	25
A3	TMA-374	F4-F6
D9	TMA-374	F7-F9	92.0285	0	8.33333
F6	TMA-374	F10-F12	38.5525	0	0
E4	TMA-374	G1-G3	96.2259	0	0
K1	TMA-374	G4-G6	96.6057	0	0
C8	TMA-374	G7-G9	22.849	0	0
B6	TMA-374	G10-G12	8.24168	0	0
H6	TMA-374	H1-H3	17.5689	0	0
E3	TMA-374	H4-H6	98.4283	0	0
D4	TMA-374	H7-H9	16.3289	0	0
H5	TMA -375	A1-A3	51.7734	0	0
A3	TMA -375	A4-A6	36.7132	6.66667	0
E13	TMA -375	A7-A9	20.6177	0	2.5
J7	TMA -375	A10-A12	54.1313	0	10
D6	TMA -375	B1-B3	42.744
E4	TMA -375	B4-B6	8.53163	5	33.3333
H10	TMA -375	B7-B9	20.0357	0	0
E12	TMA -375	B10-B12	20.8869	0	0
A5	TMA -375	C1-C3	33.553	30	35
D6	TMA -375	C4-C6	54.8717	0	6.66667
D8	TMA -375	C7-C9	60.0302	0	0
A3	TMA -375	C10-C12	7.7367	0	0
B7	TMA -375	D1-D3	52.4885	0	0
H10	TMA -375	D4-D6	22.7965	0	0
D4	TMA -375	D7-D9	92.5785	0	0
B4	TMA -375	D10-D12	28.8028	0	0
B10	TMA -375	E1-E3	9.9739	0	0
B8	TMA -375	E4-E6	69.6758	0	0
D3	TMA -375	E7-E9	92.468	0	0
B6	TMA -375	E10-E12	8.48123	0	0
B10	TMA -375	F1-F3	84.8176	0	0
B3	TMA -375	F4-F6
A4	TMA -375	F7-F9	16.8114	0	0
