# Supplementary material for: CD38-Mediated Immunosuppression as a Mechanism of Tumor Cell Escape from PD-1/PD-L1 Blockade
Source: Oxford University Press journal article supplement (doi:10.1158/2159-8290.cd-17-1033), 2018-07-16
Supplement: 21598290cd171033-sup-189304_3_supp_4848985_pvvgh9.xlsx [file 21598290cd171033-sup-189304_3_supp_4848985_pvvgh9.xlsx]

## Sheet: TMA4
Supplementary Table S8. Patient sample information as well as CD38 and PD-L1 IHC score in lung cancer tissue microarray bank TMA4.
TMA Block #	Cores	% PD-L1 positive tumor cells (membranous)	CD38 average final H-score tumor cells (membranous)	CD38 average final H-score tumor cells (cytoplasmic)
TMA 326	A1-A3	4.015	0	0
TMA 326	A4-A6	8.23	0	0
TMA 326	A7-A9	1.39	0	0
TMA 326	A10-A12	97.097	0	0
TMA 326	B1-B3	4.49	0	0
TMA 326	B4-B6	9.39667	1	1
TMA 326	B7-B9	8.55333	7.66667	5.66667
TMA 326	B10-B12	28.0567	0	0
TMA 326	C1-C3	78.6073	0	0
TMA 326	C4-C6	99.9062	0	0
TMA 326	C7-C9	97.791	0	0
TMA 326	C10-C12	99.9604	0	0
TMA 326	D1-D3	60.36	0	0
TMA 326	D4-D6	9.155	0	0
TMA 326	D7-D9	17.92	0	0
TMA 326	D10-D12	5.59	0	0
TMA 326	E1-E3	13.135	0	0
TMA 326	E4-E6
TMA 326	E7-E9	35.29
TMA 326	E10-E12	8.685	0	0
TMA 326	F1-F3
TMA 326	F4-F6		0	0
TMA 326	F7-F9
TMA 326	F10-F12	10.99	0	0
TMA 326	G1-G3	99.2364	0	2
TMA 326	G4-G6	7.66	0	0
TMA 326	G7-G9	39.4167	0	0
TMA 326	G10-G12
TMA 326	H1-H3	21.0433	0	0
TMA 326	H4-H6	9.63	0	0
TMA 327	A1-A3	29.91	0	0
TMA 327	A4-A6	6	0	0
TMA 327	A7-A9	25.08	0	0
TMA 327	A10-A12
TMA 327	B1-B3	6.63333	0	0
TMA 327	B4-B6	57.95	0	0
TMA 327	B7-B9	51.3667	0	2.33333
TMA 327	B10-B12	44.465	0	0
TMA 327	C1-C3	11.4	0	0.666667
TMA 327	C4-C6	44.8433	13.3333	13.3333
TMA 327	C7-C9	26.14	0	0
TMA 327	C10-C12	64.02	0.666667	1.66667
TMA 327	D1-D3	74.63	0	0
TMA 327	D4-D6	13.43	0	0
TMA 327	D7-D9	79.365	0	0
TMA 327	D10-D12
TMA 327	E1-E3
TMA 327	E4-E6	4.7	0	0
TMA 327	E7-E9	18.8033	0	0
TMA 327	E10-E12	41.415	0.5	0
TMA 327	F1-F3	7.34	0	0
TMA 327	F4-F6	73.4343	0	0
TMA 327	F7-F9	10.395	0	0
TMA 327	F10-F12	8.67
TMA 327	G1-G3	11.6433	0	0
TMA 327	G4-G6	28.26	0	0
TMA 327	G7-G9	5.46667	1	2.66667
TMA 327	G10-G12	98.4762	0	0
TMA 327	H1-H3	97.8324	0	0
TMA 327	H4-H6	82.6987
TMA 328	A1-A3	60.4533	0	0
TMA 328	A4-A6	14.665	0	0
TMA 328	A7-A9	8.535	0	2.5
TMA 328	A10-A12		0	0
TMA 328	B1-B3	20.95	8.33333	9
TMA 328	B4-B6	12	0	41.6667
TMA 328	B7-B9	33.51	0	0
TMA 328	B10-B12	3.30667	0	0
TMA 328	C1-C3	4.47	0	0
TMA 328	C4-C6	24.0467	0.333333	1
TMA 328	C7-C9	17.2467	1.66667	1.66667
TMA 328	C10-C12
TMA 328	D1-D3	6.96667	0	0
TMA 328	D4-D6	87.886	0	0
TMA 328	D7-D9	99.9648	0	0
TMA 328	D10-D12	38.41	0	0
TMA 328	E1-E3	13.18	0	0
TMA 328	E4-E6	44.165	90	60
TMA 328	E7-E9	33.2767	0	0
TMA 328	E10-E12	25.73	0	0
TMA 328	F1-F3	51.86	0	0
TMA 328	F4-F6	70.72	7.5	7.5
TMA 328	F7-F9
TMA 328	F10-F12	99.4709
TMA 328	G1-G3	99.4042
TMA 328	G4-G6	77.795	0	0
TMA 328	G7-G9	1.35	0	0
TMA 328	G10-G12	2.62	0	0
TMA 328	H1-H3		0	0
TMA 328	H4-H6	6.795	0	0
TMA 329	A1-A3	78.75	0	0
TMA 329	A4-A6	94.2379	126.667	118.333
TMA 329	A7-A9	7.29	0	0
TMA 329	A10-A12	17.2033	0	0
TMA 329	B1-B3	99.7585	0	0
TMA 329	B4-B6	42.8133	0	0
TMA 329	B7-B9	79.13	2.5	5
TMA 329	B10-B12	26.8167	0	0
TMA 329	C1-C3	31.4467	0	0
TMA 329	C4-C6	34.285	12.5	12.5
TMA 329	C7-C9	11.64	0	0
TMA 329	C10-C12	92.0053	2.5	2.5
TMA 329	D1-D3	91.4735
TMA 329	D4-D6	46.025	0	0
TMA 329	D7-D9
TMA 329	D10-D12	21.87	0	0
TMA 329	E1-E3	9.02	0	0
TMA 329	E4-E6	95.3425	0	0
TMA 329	E7-E9	43.745	0	0
TMA 329	E10-E12	17.8167	8.33333	8.33333
TMA 329	F1-F3	99.7154	0	0
TMA 329	F4-F6	4.1	0	0
TMA 329	F7-F9	11.24	0	0
TMA 329	F10-F12	13.5	3.33333	3.33333
TMA 329	G1-G3	23.5367	0	0
TMA 329	G4-G6	100	0	0
TMA 329	G7-G9	98.853	0	0
TMA 329	G10-G12	10.64	0	0
TMA 329	H1-H3	5.55	0	0
TMA 329	H4-H6	20.6133	0	0
TMA 330	A1-A3	15.23	0	0
TMA 330	A4-A6	10.14	0	0
TMA 330	A7-A9	51.205	0	0
TMA 330	A10-A12	4.54	1	1
TMA 330	B1-B3	16.92	0	0
TMA 330	B4-B6	99.4961	0	0
TMA 330	B7-B9	13.56	0	0
TMA 330	B10-B12	3.78	0	0
TMA 330	C1-C3	20.6767	0	0
TMA 330	C4-C6	6.62333	0	0
TMA 330	C7-C9	19.6467	0	0
TMA 330	C10-C12	7.27333	0	0
TMA 330	D1-D3		0	0
TMA 330	D4-D6	32.6867	0	0
TMA 330	D7-D9	4.11333	110	81.6667
TMA 330	D10-D12	30.3133	0	0
TMA 330	E1-E3	5.63333	0	0
TMA 330	E4-E6	62.615	0	0
TMA 330	E7-E9	34.5933	0	0
TMA 331	A1-A3	3.155	0	0
TMA 331	A4-A6	18.6533	5.66667	5.66667
TMA 331	A7-A9	98.341
TMA 331	A10-A12	0.44	0	0
TMA 331	B1-B3	6.32667	0	0
TMA 331	B4-B6	23.03	0	0
TMA 331	B7-B9	2.40667	3.33333	3.33333
TMA 331	B10-B12	2.99	1.66667	0.666667
TMA 331	C1-C3	67.86	0	0
TMA 331	C4-C6	12.45	0	0
TMA 331	C7-C9	9.945	0	0
TMA 331	C10-C12	3.11333	0	0
TMA 331	D1-D3	7.85	6.5	2.5
TMA 331	D4-D6		0	0
TMA 331	D7-D9	22.2533	0	0
TMA 331	D10-D12	18.0233	0	0
TMA 331	E1-E3	65.2647	0	0
TMA 331	E4-E6	1.59667	0	0
TMA 331	E7-E9	7.515	0	0
TMA 331	E10-E12	2.99333	0	0
TMA 331	F1-F3	99.8425	0	0
TMA 331	F4-F6	11.1333	0	0
TMA 331	F7-F9	14.365	0	36.6667
TMA 331	F10-F12	91.6883	0	0
TMA 331	G1-G3	34.11	0	0
TMA 331	G4-G6	33.08	0	0
TMA 331	G7-G9	16.21	0	0
TMA 331	G10-G12	55.335	0	0
TMA 331	H1-H3	16.67	0	0
TMA 331	H4-H6	7.22	0	0
TMA 332	A1-A3	6.87333	0	0
TMA 332	A4-A6	29.18	0	0
TMA 332	A7-A9	16.3767	0	0
TMA 332	A10-A12	7.02667	0	0
TMA 332	B1-B3	45.86	0	0
TMA 332	B4-B6	99.5062	5	5
TMA 332	B7-B9	43.25	3	3
TMA 332	B10-B12	62.32	0	0
TMA 332	C1-C3	28.1333	0	0
TMA 332	C4-C6	7.21333	40	46.6667
TMA 332	C7-C9	44.1867	0	0
TMA 332	C10-C12	96.2663	0	0
TMA 332	D1-D3	32.7	0	0
TMA 332	D4-D6	5.59	0	0
TMA 332	D7-D9	92.0875	0	0
TMA 332	D10-D12
TMA 332	E1-E3	20.7033	0	0
TMA 332	E4-E6	99.4325	0	0
TMA 332	E7-E9	0.68	0	0
TMA 332	E10-E12	11.95	0	0
TMA 332	F1-F3	26.81	0	0
TMA 332	F4-F6	26.865	0	5
TMA 332	F7-F9	72.699	0	0
TMA 332	F10-F12	32.185	0	0
TMA 332	G1-G3	4.85	0	0
TMA 332	G4-G6	1.86	0	0
TMA 332	G7-G9	99.188	0	0
TMA 332	G10-G12	99.5768	0	0
TMA 332	H1-H3	6.98	0	0
TMA 332	H4-H6	99.0476	0	0
TMA 333	A1-A3	60.2933	0	0
TMA 333	A4-A6	8.30667	0	0
TMA 333	A7-A9	66.4233	0	0
TMA 333	A10-A12	29.92	0	0
TMA 333	B1-B3	4.03667	0	0
TMA 333	B4-B6	47.46	3.33333	8.33333
TMA 333	B7-B9	22.03
TMA 333	B10-B12	4.81667	0	0
TMA 333	C1-C3	12.7567	0	0
TMA 333	C4-C6	42.6133	0	0
TMA 333	C7-C9	80.87
TMA 333	C10-C12	2.35	0	0
TMA 333	D1-D3	4.175	0	2.5
TMA 333	D4-D6	52.74	0	0
TMA 333	D7-D9	2.80333	0	0
TMA 333	D10-D12	26.2333	0	0
TMA 333	E1-E3	93.9515	0	0
TMA 333	E4-E6	11.61	63.3333	73.3333
TMA 333	E7-E9	22.85	0	0
TMA 333	E10-E12	6.32	5	5
TMA 333	F1-F3	27.4667	0	0
TMA 333	F4-F6	70.306	0	0
TMA 333	F7-F9	16.14
TMA 333	F10-F12	23.3	26	31
TMA 333	G1-G3	15.1467	0	0
TMA 334	A1-A3	23.985	5	5
TMA 334	A4-A6	75.9237	0	0
TMA 334	A7-A9	17.3367	0	0
TMA 334	A10-A12	5.735	33	33
TMA 334	B1-B3	11.615	2	2
TMA 334	B4-B6	66.88	0	0
TMA 334	B7-B9	41.4617	0	1
TMA 334	B10-B12	18.5267	1.66667	1.66667
TMA 334	C1-C3	8.19	0	0
TMA 334	C4-C6	2.43333	0	0
TMA 334	C7-C9	9.5	0	0
TMA 334	C10-C12	15.095	0	0
TMA 334	D1-D3	4.77	10	18.3333
TMA 334	D4-D6	40.985	0	0
TMA 334	D7-D9	2.22	0	0
TMA 334	D10-D12	57.8633	0	0
TMA 334	E1-E3	9.79333	0	0
TMA 334	E4-E6	9.67667	0	1.66667
TMA 334	E7-E9	25.23	0	0
TMA 334	E10-E12		0	0
TMA 334	F1-F3	25.9067	0	0
TMA 334	F4-F6	66.8	0	0
TMA 334	F7-F9	7.095	0	0
TMA 334	F10-F12	23.0967	0	0
TMA 334	G1-G3	5.40667	0	0
TMA 335	A1-A3	13.4467	55	68.3333
TMA 335	A4-A6	24.67	0	0
TMA 335	A7-A9	88.1915	0	0
TMA 335	A10-A12	26.86	0	0
TMA 335	B1-B3	97.9065	0	0
TMA 335	B4-B6	99.9312	0	0
TMA 335	B7-B9	14.7633	0	0
TMA 335	B10-B12	34.56	0	0
TMA 335	C1-C3	44.3167	0	0
TMA 335	C4-C6	27.455	0	0
TMA 335	C7-C9	35.35	0	0
TMA 335	C10-C12	4.27667	0	0
TMA 335	D1-D3	14.3933	0	0
TMA 335	D4-D6	2.635	0	0
TMA 335	D7-D9	2.53333	0	0
TMA 335	D10-D12	4.96	0	0
TMA 335	E1-E3		0	0
TMA 335	E4-E6
TMA 335	E7-E9	44.0867	0	0
TMA 335	E10-E12	5	0	0
TMA 335	F1-F3	20.1867	0	0
TMA 335	F4-F6	4.04	0	0
TMA 335	F7-F9	99.9402	0	0
TMA 336	A1-A3	7.26	0	0
TMA 336	A4-A6	24.1167	0	31.6667
TMA 336	A7-A9	6.89667	0	0
TMA 336	A10-A12	98.795
TMA 336	B1-B3	25.64	0	5
TMA 336	B4-B6	96.831	0	8.33333
TMA 336	B7-B9	23.89	0	120
TMA 336	B10-B12	29.9133	0	0
TMA 336	C1-C3	5.02333	0	0
TMA 336	C4-C6	1.33333	0	0
TMA 336	C7-C9	19.7467	0	0
TMA 336	C10-C12
TMA 336	D1-D3	85.43	0	0
TMA 336	D4-D6	7.585	0	0
TMA 336	D7-D9	13.46	0	0
TMA 336	D10-D12	14.8933	0	0
TMA 336	E1-E3	21.6267	0	0
TMA 336	E4-E6	64.0533	0	0
TMA 336	E7-E9	28.8433	0	0
TMA 336	E10-E12	2.92333	0	0
TMA 336	F1-F3	20.7333	0	0
TMA 336	F4-F6	64.4684	17.5	35
TMA 336	F7-F9	21.0967	0	0
TMA 336	F10-F12	38.9	0	0
TMA 336	G1-G3	10.32	0	0
TMA 336	G4-G6	46.5767	3.33333	6.66667
TMA 336	G7-G9	62.49	0	0
TMA 336	G10-G12	81.6283	0	0
TMA 336	H1-H3	15.43	2.5	15
TMA 336	H4-H6	22.4567	0	0
TMA 336	H7-H9
TMA 337	A1-A3	19.35	0	0
TMA 337	A4-A6	47.28	0	0
TMA 337	A7-A9	21.0833	0	0
TMA 337	A10-A12	26.175	0	0
TMA 337	B1-B3	27.3433	0	0
TMA 337	B4-B6	21.16	0	0
TMA 337	B7-B9	23.8667	0	0
TMA 337	B10-B12	5.03
TMA 337	C1-C3	14.9167	0	0
TMA 337	C4-C6	30.05	0	0
TMA 337	C7-C9	89.589	0	0
TMA 337	C10-C12	9.66667	0	0
TMA 337	D1-D3	55.1633	0	0
TMA 337	D4-D6	14.55	0	0
TMA 337	D7-D9	7.965	0	0
TMA 337	D10-D12	3.6	0	0
TMA 337	E1-E3	8.18	0	0
TMA 337	E4-E6	10	0	0
TMA 337	E7-E9	11.18	0	0
TMA 337	E10-E12	19.84
TMA 337	F1-F3	43.03	0	0
TMA 337	F4-F6	2.61333	0	0
TMA 337	F7-F9	1.94	0	0
TMA 337	F10-F12		0	0
TMA 337	G1-G3
TMA 337	G4-G6	18.22	0	2.5
TMA 337	G7-G9	39.34	0	5
TMA 337	G10-G12	33.435	0	0
TMA 337	H1-H3	5.75667	0	0
TMA 337	H4-H6	7.40667	0	0
TMA 338	A1-A3	17.2833	0	0
TMA 338	A4-A6	2.27667	0	0
TMA 338	A7-A9	99.5735	0	0
TMA 338	A10-A12	10.8467	0	0
TMA 338	B1-B3	14.1233	0	0
TMA 338	B4-B6	1.725	0	0
TMA 338	B7-B9	29.6767	0	0
TMA 338	B10-B12	16.07	0	0
TMA 338	C1-C3	6.57667	0	0
TMA 338	C4-C6	33.965	0	0
TMA 338	C7-C9	14.64	0	0
TMA 338	C10-C12	33.2633	0	0
TMA 338	D1-D3	12.08	0	0
TMA 338	D4-D6	10.9767	0	0
TMA 338	D7-D9	2.8	0	0
TMA 338	D10-D12	88.5109	0	0
TMA 338	E1-E3	37.905	0	0
TMA 338	E4-E6	5.46	0	5
TMA 338	E7-E9	50.5433	0	0
TMA 338	E10-E12	21.23	0	0
TMA 338	F1-F3
TMA 338	F4-F6	7.14333	0	1.66667
TMA 338	F7-F9	13.01	0	0
TMA 338	F10-F12	49.8933	0	0
TMA 338	G1-G3	99.2502	0	0
TMA 338	G4-G6	1.98	0	0
TMA 338	G7-G9	69.35	0	0
TMA 338	G10-G12	29.93	0	0
TMA 338	H1-H3	32.36	0	0
TMA 338	H4-H6
TMA 339	A1-A3	7.19667	0	0
TMA 339	A4-A6	19.8967	0	10
TMA 339	A7-A9	61.19	0	0
TMA 339	A10-A12	36.45	0	0
TMA 339	B1-B3	99.2806
TMA 339	B4-B6	50.5767	0	20
TMA 339	B7-B9	80.67	0	0
TMA 339	B10-B12	87.52	0	0
TMA 339	C1-C3	21.4467	0	0
TMA 339	C4-C6	74.14
TMA 339	C7-C9	74.685	0	0
TMA 339	C10-C12	90.9157	0	0
TMA 339	D1-D3	73.6808	0	0
TMA 339	D4-D6	53.6833	0	0
TMA 339	D7-D9	50.5233	0	0
TMA 339	D10-D12	70.676	0	0
TMA 339	E1-E3	38.1967	0	0
TMA 339	E4-E6	92.226	0	0
TMA 339	E7-E9	74.591	0	0
TMA 339	E10-E12	27.0133	0	0
TMA 339	F1-F3	36.39	2.33333	2.33333
TMA 339	F4-F6	81.37	0	0
TMA 339	F7-F9	79.565	0	0
TMA 339	F10-F12	2.4	0	0
TMA 342	A1-A3	14.955	0	5
TMA 342	A4-A6	9.69	7.5	25
TMA 342	A7-A9	4.74	0	0
TMA 342	A10-A12	68.9	60	50
TMA 342	B1-B3	40.55	0	0
TMA 342	B4-B6	5.05	0	0
TMA 342	B7-B9	5.77333	0	0
TMA 342	B10-B12	6.34	0	0
TMA 342	C1-C3		0	0
TMA 342	C4-C6	19.58	0	0
TMA 342	C7-C9	17.7867	0	0
TMA 342	C10-C12	7.10667	0	0
TMA 342	D1-D3	76.965
TMA 342	D4-D6	42.17	0	0
TMA 342	D7-D9	7.74333	0	0
TMA 342	D10-D12	16.435	0	0
TMA 342	E1-E3	7.455	0	0
TMA 342	E4-E6	64.485	0	0
TMA 342	E7-E9	36.77	0	0
TMA 342	E10-E12	16.09	0	0
TMA 342	F1-F3	96.61	0	0
TMA 342	F4-F6	37.63	0	0
TMA 342	F7-F9	8.24667	0	2.33333
TMA 342	F10-F12	10.505	0	0
TMA 342	G1-G3	34.195	0	0
TMA 342	G4-G6	40.77	0	0
TMA 342	G7-G9	14.555	0	0
TMA 342	G10-G12	2.38	0	0
TMA 342	H1-H3	8.26	0	0
TMA 342	H4-H6	15.86
TMA 343	A1-A3	4.97	0	85
TMA 343	A4-A6	41.22	0	5
TMA 343	A7-A9	33.0733	0	0
TMA 343	A10-A12	3.945	0	0
TMA 343	B1-B3	39.485	3.33333	3.33333
TMA 343	B4-B6	19.7567	33.3333	25
TMA 343	B7-B9	4.68667	0	0
TMA 343	B10-B12	0.57
TMA 343	C1-C3	53.96	0	0
TMA 343	C4-C6	99.9027	0	0
TMA 343	C7-C9	68.145
TMA 343	C10-C12	73.73	1.66667	1.66667
TMA 343	D1-D3	27.79	0	0
TMA 343	D4-D6
TMA 343	D7-D9	6.515	0	0
TMA 343	D10-D12	5.13333	0	0
TMA 343	E1-E3	28.2433	0	0
TMA 343	E4-E6	1.35	0	0
TMA 343	E7-E9	7.1	0	0
TMA 343	E10-E12
TMA 343	F1-F3	84.35	0	0
TMA 343	F4-F6	4.085	0	80
TMA 343	F7-F9	9.675	35	55
TMA 343	F10-F12	9.955	0	0
TMA 343	G1-G3
TMA 343	G4-G6	26.37	32.5	37.5
TMA 343	G7-G9	56.44	8.33333	8.33333
TMA 343	G10-G12	29.165	46.6667	70
TMA 343	H1-H3	36.32	5	5
TMA 343	H4-H6	33.1533	8.33333	8.33333
TMA 344	A1-A3	5.325	0	0
TMA 344	A4-A6	45.665	5	5
TMA 344	A7-A9	98.23	0	0
TMA 344	A10-A12	100	0	0
TMA 344	B1-B3	35.895	0	0
TMA 344	B4-B6	1.76667	0	0
TMA 344	B7-B9	21.5233	0	0
TMA 344	B10-B12	4.09
TMA 344	C1-C3	17.21	0	0
TMA 344	C4-C6	86.8251	0.666667	1.66667
TMA 344	C7-C9	65.725	0	0
TMA 344	C10-C12		0	0
TMA 344	D1-D3		0	0
TMA 344	D4-D6		0	0
TMA 344	D7-D9	99.9384	0	0
TMA 344	D10-D12	87.8667	0	3.33333
TMA 344	E1-E3	16.4667	38.3333	38.3333
TMA 344	E4-E6	85.64	0	0
TMA 344	E7-E9	29.825	0	0
TMA 344	E10-E12
TMA 344	F1-F3		0	0
TMA 344	F4-F6	31.005	0	0
TMA 344	F7-F9	56.65	0	0
TMA 344	F10-F12	2.09667	0	0
TMA 344	G1-G3	4.58333	0	0
TMA 344	G4-G6	83.02	0	0
TMA 344	G7-G9	34.38	0	0
TMA 344	G10-G12		0	0
TMA 344	H1-H3
TMA 344	H4-H6	58.21	20	20
TMA 345	A1-A3	13.27	0	0
TMA 345	A4-A6
TMA 345	A7-A9	37.26	2	5
TMA 345	A10-A12	8.65	0	0
TMA 345	B1-B3	53.52	0	0
TMA 345	B4-B6	22.22	0	0
TMA 345	B7-B9	84.37	0	0
TMA 345	B10-B12	0.88	0	0
TMA 345	C1-C3	99.0587	0	0
TMA 345	C4-C6	9.95667	0	0
TMA 345	C7-C9	73.325	0	0
TMA 345	C10-C12	17.0267	0	0
TMA 345	D1-D3
TMA 345	D4-D6	28.01	0	0
TMA 345	D7-D9	98.8748	0	0
TMA 345	D10-D12	0.57
TMA 345	E1-E3	45.1133	0	0
TMA 345	E4-E6	13.1	0	0
TMA 345	E7-E9	6.71333	0	0
TMA 345	E10-E12
TMA 345	F1-F3	87.14	0	0
TMA 345	F4-F6	20.645	0	0
TMA 345	F7-F9	5.56	0	0
TMA 345	F10-F12		0	0
TMA 345	G1-G3	33.275	0	3.33333
TMA 345	G4-G6	99.2857	0	0
TMA 345	G7-G9	1.75	0	0
TMA 345	G10-G12	6.52	0	0
TMA 345	H1-H3	29.7133	0	0
TMA 345	H4-H6	9.14333	0	0
TMA 346	A1-A3	13.55	0	0
TMA 346	A4-A6
TMA 346	A7-A9	68.84	0	0
TMA 346	A10-A12	24.88	0	0
TMA 346	B1-B3	32.45	0	0
TMA 346	B4-B6	37.95	0	0
TMA 346	B7-B9	49.2	0	0
TMA 346	B10-B12
TMA 346	C1-C3	6.955	0	0
TMA 346	C4-C6	9.6	0	0
TMA 346	C7-C9	9.755	0	0
TMA 346	C10-C12	39.705	0	0
TMA 346	D1-D3	96.4616	23.3333	23.3333
TMA 346	D4-D6	99.362
TMA 346	D7-D9	31.895	3.33333	3.33333
TMA 346	D10-D12	100	0	0
TMA 346	E1-E3	5.63	0	0
TMA 346	E4-E6
TMA 346	E7-E9	27.905	0	0
TMA 346	E10-E12	74.3077	0	0
TMA 346	F1-F3	13.0667	0	0
TMA 346	F4-F6	14.35	0	30
TMA 346	F7-F9	64.2367	0	0
TMA 346	F10-F12
TMA 346	G1-G3	59.1033	0	0
TMA 346	G4-G6	14.1733	0	0
TMA 346	G7-G9	2.78	0	0
